1           **Implication of synaptotagmins 4 and 7 in activity-dependent**  
2                               **somatodendritic dopamine release**

3

4   **Benoît Delignat-Lavaud**<sup>1,2,3</sup>, **Charles Ducrot**<sup>1,2,3</sup>, **Willemieke Kouwenhoven**<sup>1,2,3</sup>, **Nina**  
5                               **Feller**<sup>1,2,3</sup>, **Louis-Éric Trudeau**<sup>1,2,3</sup>

6

7

8           <sup>1</sup>Department of Pharmacology and Physiology, Faculty of Medicine, Université de  
9                               Montréal

10           <sup>2</sup>Department of Neurosciences, Faculty of Medicine, Université de Montréal

11                               <sup>3</sup>CNS Research Group (GRSNC),  
12                               Montréal, QC, Canada H3C 3J7

13

14

15

16

17

18

19

20

21

22

23   **Corresponding author:**

24   Dr. Louis-Éric Trudeau

25   Department of pharmacology and physiology

26   Faculty of Medicine

27   Université de Montréal

28   louis-eric.trudeau@umontreal.ca

29   514-343-5692

30

31 **ABSTRACT**

32

33 Dopamine (DA) neurons can release DA not just from axon terminals, but also  
34 from their somatodendritic (STD) compartment through a mechanism that is still  
35 incompletely understood. Using voltammetry in mouse mesencephalic brain slices, we  
36 find that STD DA release has low capacity, is stable in response to electrical but not  
37 optogenetic train pulses and shows a calcium sensitivity that is comparable to that of  
38 axonal release. It is also strikingly more resilient compared to axonal release in a 6-  
39 hydroxydopamine model of Parkinson's disease plasticity. We find that the molecular  
40 mechanism of STD DA release differs from axonal release with regards to the  
41 implication of synaptotagmin (Syt) calcium sensors. While individual constitutive knock-  
42 out Syt4 and Syt7 is not sufficient to reduce STD DA release, removal of both isoforms  
43 reduces this release by ~50%, leaving axonal release unimpaired. Our work unveils clear  
44 differences in the mechanisms of STD and axonal DA release.

45

46

## 47 INTRODUCTION

48 Dopamine (DA) neurons of the mesencephalon play a key role in motor control,  
49 motivated behaviors and cognition<sup>1,2</sup>. DA neurons can release DA not only from axon  
50 terminals by a classical exocytosis mechanism<sup>3</sup>, but also through their somatodendritic  
51 (STD) compartment, as demonstrated by multiple approaches including *in vivo*  
52 microdialysis, fast scan cyclic voltammetry (FSCV) and patch-clamp recordings of D2  
53 receptor mediated currents in the ventral tegmental area (VTA) and substantia nigra pars  
54 compacta (SNc)<sup>4-7</sup>. These nuclei contain the cell body and dendrites of DA neurons, but  
55 little if any DA-containing axon terminals<sup>5,8</sup>. Although there is limited direct evidence,  
56 STD DA release is believed to be implicated in regulating the excitability of DA neurons  
57 though activation of STD D2 autoreceptors<sup>9</sup>. It has also been suggested to regulate motor  
58 behaviors<sup>10,11</sup>, mainly by local activation of D1 receptors.

59 The molecular mechanism of STD DA release is still unclear. Reversal of the DA  
60 transporter (DAT) has been proposed<sup>12</sup>, but this mechanism cannot account for the results  
61 of studies that measured STD DA release *in vitro* and *in vivo* in the presence of DAT  
62 blockers. These studies unequivocally show that blocking DAT leads to an increase in  
63 extracellular DA, whether in evoked release<sup>4,6,9,13,14</sup> or spontaneous release<sup>15-20</sup>. A  
64 vesicular exocytotic-like mechanism has therefore been proposed, in agreement with the  
65 fact that STD DA release is activity-dependent (TTX-sensitive)<sup>9,18,21</sup>, reserpine-  
66 sensitive<sup>9,22,23</sup>, calcium-dependent<sup>9,13,18,20,22,24</sup>, and blocked by botulinum neurotoxins,  
67 which disrupt SNARE-proteins<sup>18,25,26</sup>. Although large pools of DA-containing small clear  
68 synaptic vesicles are not found in the dendrites of DA neurons, these dendrites contain  
69 pleiomorphic vesicles that bear the vesicular monoamine transporter (VMAT2),

70 suggesting that they could be sites of DA storage in dendrites<sup>27</sup>. Together, these findings  
71 suggest that, although there may be some fundamental differences between the  
72 mechanisms of terminal and STD DA release, both implicate a form of exocytosis.

73         Although STD DA release is calcium-dependent, conflicting results exist  
74 regarding the calcium-sensitivity of STD DA release in comparison with axonal release.  
75 Previous studies performed in guinea pig reported that STD DA release persists at  
76 extracellular calcium concentrations as low as 0.5 mM, a concentration at which axonal  
77 release is typically abrogated from most axon terminals<sup>13,18</sup>. In contrast, previous work  
78 performed with mouse tissue and indirectly detecting STD DA release using the patch-  
79 clamp technique and STD D2 receptor activation, reported that axonal and STD DA  
80 release display a similar calcium-dependency<sup>9,24,28-31</sup>. Here, we reexamined this question  
81 in mouse brain slices after optimizing direct detection of DA using FSCV.

82         STD DA release could play a role in adaptations of basal ganglia circuitry and  
83 motor behaviors during the progression of Parkinson's disease (PD). Compatible with the  
84 dying-back hypothesis of PD suggesting that PD pathology starts at the axon terminal  
85 level<sup>32</sup>, previous work in rats measuring baseline STD DA release by microdialysis  
86 suggested that this form of release, is preserved for longer periods of time compared to  
87 axonal DA release following 6-OHDA lesions<sup>33</sup>. It is unclear if activity-dependent STD  
88 release is similarly resilient. Here, we examined the impact of a striatal 6-  
89 hydroxydopamine (6-OHDA) lesion on evoked STD DA release 1 day after the lesion,  
90 where an early loss of axon terminals occurs, and 14 days after the lesion at a time where  
91 soma and dendrites of DA neurons are severely impacted<sup>34</sup>.

92           Finally, an important outstanding question is the identification of the molecular  
93 mechanisms of STD DA release. Prior work has demonstrated that many proteins  
94 involved in regulated exocytosis, such as the calcium sensor Syt1, are selectively targeted  
95 to the axonal domain of neurons and not in dendrites<sup>3,19,35-37</sup>. Building on previous *in*  
96 *vitro* work suggesting possible roles of Syt4 and Syt7<sup>19</sup>, in the present study we tested the  
97 hypothesis that Syt4 and Syt7 play a key role in STD DA release in the intact brain by  
98 quantifying STD DA release in Syt4, Syt7 and Syt4/7 double knockout (KO) mice.

99

## 100 MATERIALS AND METHODS

101

### 102 Animals

103 Male and female mice of 11-12 weeks were used in this study. For optogenetic  
104 experiments, B6;129S-Gt(ROSA)26Sor<sup>tm32(CAG-COP4\*H134R/EYFP)Hze/J</sup> (Ai32, The Jackson  
105 Laboratory, stock 012569, USA) homozygote mice expressing a floxed H134R variant of  
106 the light-activated channelrhodopsin-2 were bred with homozygote B6.SJL-  
107 Slc6a3<sup>tm1.1(cre)Bkmm/J</sup> (DAT<sup>IREScree</sup>, The Jackson Laboratory, stock 006660, USA)  
108 expressing the cre recombinase under control of the DAT promoter, allowing  
109 channelrhodopsin-2 to be expressed selectively in DA neurons. Heterozygote DAT<sup>IREScree</sup>  
110 mice were also used for experiments in which ChR2 was virally expressed. Constitutive  
111 knock-out mice for Syt4 (129S6.129X1(B6)-Syt4<sup>tm1Hahe/J</sup>, The Jackson Laboratory, stock  
112 #012400, USA)<sup>38</sup>, Syt7<sup>39</sup> and WT littermates were bred from heterozygous crosses or  
113 crossed with each other to obtain double KO mice. Genotyping for Syt4 KO mice was  
114 determined using specific primers to target the wild type Syt4 sequence (primers  
115 Syt4WT-fwd and Syt4WT-rev) and the neomycin cassette within the mutated allele  
116 (primers neo-fwd and Syt4WT-rev) – Syt4WT-fwd:  
117 CACTTCCCTCACGTCAGAGGAG, - Syt4WT-rev:  
118 GCAAGGAGAGCTCTTGATGTG, - neo-fwd: AACCACTGCTCGACATTGGG.  
119 Genotyping for Syt7 KO mice was performed using specific primers to target the wild  
120 type Syt7 sequence (Syt7WT-fwd: CATCCTCCACTGGCCATGAATG; - Syt7WT-rev:  
121 GCTTACCTTGGTCTCCAG) and the neomycin cassette within the mutated allele  
122 (neo-fwd: CTTGGGTGGAGAGGCTATTC; neo-rev:

123 AGGTGAGATGACAGGAGATC), as provided by Jackson. Genotyping for Syt7  
124 mutation in combined Syt4/7 KO mice was determined using another set of specific  
125 primers due to overlapping sequences within the neomycin cassette used in both the Syt4  
126 and Syt7 mouse lines: - neo-fwd: CTTGGGTGGAGAGGCTATTC and Syt7W<sup>Texon4</sup>:  
127 AGTGTCCAGGCTCCC. Experiments were performed blind with regards to animal  
128 genotype, with the exception of Syt4 KO mice, because these KO mice could be easily  
129 identified due to a neurodevelopmental alteration of the anterior commissure and corpus  
130 callosum (**Fig. S1**). All procedures involving animals and their care were conducted in  
131 accordance with the Guide to care and use of Experimental Animals of the Canadian  
132 Council on Animal Care. The experimental protocols were approved by the animal ethics  
133 committees of the Université de Montréal. Housing was at a constant temperature (21°C)  
134 and humidity (60%), under a fixed 12h light/dark cycle, with food and water available ad  
135 libitum.

### 136 **Stereotaxic injections**

137 6-7 week-old DAT<sup>IRESc<sup>re</sup></sup> mice were anesthetized with isoflurane (Aerrane; Baxter,  
138 Deerfield, IL, USA) and fixed on a stereotaxic frame (Stoelting, Wood Dale, IL, USA). A  
139 small hole was drilled in the exposed skull and a Hamilton syringe was used for the  
140 injections. For optogenetic experiments, an adeno-associated virus (AAV5-EF1a-DIO-  
141 hChR2(H134R)-EYFP, 4,2x10<sup>12</sup> vg/mL, UNC GTC Vector Core, USA) was injected  
142 bilaterally at the following injection coordinates [AP (anterior–posterior; ML (medial–  
143 lateral); DV (dorsal-ventral), from bregma], to infect neurons in the entire ventral  
144 mesencephalon: AP -3.0 mm; ML +/- 1.0 mm; DV -4.5 mm. Animals recovered in their  
145 home cage and were closely monitored for 3 days. The animals were used one month

146 after injection, allowing maximal expression of ChR2 in DA neurons. Success of the  
147 injection was visually validated each time during the slicing of the brains by visualizing  
148 the presence of the eYFP reporter. For 6-OHDA experiments, saline or 6-OHDA (5  
149  $\mu\text{g}/\mu\text{L}$ ; 2  $\mu\text{L}$  in total, at a rate of 0.5  $\mu\text{L}/\text{min}$ , Sigma, Canada) were injected unilaterally in  
150 the dorsal striatum: AP +1.0 mm; ML +1.5 mm; DV -2.8 mm. The brains were used for  
151 FSCV experiments 1 or 14 days after the injection.

### 152 **Brain slice preparation and solutions**

153 Acute brain slices from 11-12-week-old male or female mice were used for the  
154 FSCV recordings. When possible, matched pairs of WT and KO mice were used on each  
155 experimental day. The animals were anesthetized with halothane, quickly decapitated and  
156 the brain harvested. Next, the brain was submersed in ice-cold oxygenated artificial  
157 cerebrospinal fluid (aCSF) containing (in mM): NaCl (125), KCl (2.5),  $\text{KH}_2\text{PO}_4$  (0.3),  
158  $\text{NaHCO}_3$  (26), glucose (10),  $\text{CaCl}_2$  (2.4),  $\text{MgSO}_4$  (1.3) and coronal VTA and/or striatal  
159 brain slices of 300  $\mu\text{m}$  thickness were prepared with a VT1000S vibrating blade  
160 microtome. Once sliced, the tissue was transferred to oxygenated aCSF at room  
161 temperature and allowed to recover for at least 1h. For recordings, slices were placed in a  
162 custom-made recording chamber superfused with aCSF at 1 ml/min and maintained at  
163 32°C with a TC-324B single channel heater controller (Warner Instruments, USA). All  
164 solutions were adjusted at pH 7.35-7.4, 300 mOsm/kg and saturated with 95%  $\text{O}_2$ -5%  
165  $\text{CO}_2$  at least 30 min prior to each experiment.

### 166 **Fast scan cyclic voltammetry recordings**



167           Optically or electrically evoked DA release was measured by FSCV using a 7  $\mu\text{m}$   
168 diameter carbon-fiber electrode placed into the tissue  $\sim 100 \mu\text{m}$  below the surface. A  
169 bipolar electrode (Plastics One, Roanoke, VA, USA) or an optical fiber connected to a  
170 470 nm wavelength LED was placed  $\sim 200 \mu\text{m}$  away. Carbon-fiber electrodes were  
171 fabricated as previously described<sup>40</sup>. Briefly, carbon fibers (Goodfellow Cambridge  
172 Limited, UK) of 7  $\mu\text{m}$  in diameter were aspirated into ethanol-cleaned glass capillaries  
173 (1.2 mm O.D., 0.68 mm I.D., 4 inches long; World Precision Instruments, FL, USA). The  
174 glass capillaries were then pulled using a P-2000 micropipette puller (Sutter Instruments,  
175 Novato, USA), dipped into 90°C epoxy for 30s (Epo-Tek 301, Epoxy Technology,  
176 MASS, USA) and cleaned in hot acetone for 3s. The electrodes were heated at 100°C for  
177 12h and 150°C for 5 days. Electrodes were polished and filed with potassium acetate at  
178 4M and potassium chloride at 150 mM. The protruding carbon fibers were cut using a  
179 scalpel blade under direct visualization to a length allowing to obtain maximal basal  
180 currents of 100 to 180 nA.

181           The electrodes were calibrated with 1  $\mu\text{M}$  DA in aCSF before and after each  
182 recorded slice and the mean of the current values obtained were used to determine the  
183 amount of released DA. After use, electrodes were cleaned with isopropyl alcohol  
184 (Bioshop, Canada). The potential of the carbon fiber electrode was scanned at a rate of  
185 300 V/s according to a 10 ms triangular voltage wave ( $-400$  to 1000 mV vs Ag/AgCl)  
186 with a 100 ms sampling interval, using a CV 203BU headstage preamplifier (Molecular  
187 Devices) and a Axopatch 200B amplifier (Molecular Devices, USA). Data were acquired  
188 using a Digidata 1440a analog to digital converter board (Molecular Devices, USA)  
189 connected to a computer using Clampex (Molecular Devices, USA). Slices were left to

190 stabilize for 20 min before any electrochemical recordings. After positioning of the  
191 bipolar stimulation electrode or the optical probe and carbon fiber electrodes in the tissue,  
192 single pulses (400  $\mu$ A or 30 mW, 1ms,) or pulses-train (30 pulses at 10 Hz) were applied  
193 to the tissue to trigger DA release. For evaluating the calcium dependency of axonal and  
194 STD release, variations of calcium concentrations in the aCSF (0, 0.5 and 2.4 mM) were  
195 compensated by changing the concentration of  $MgSO_4$  to keep divalent cation levels  
196 equivalent.

### 197 **Immunohistochemistry**

198 For Syt immunolabelling experiments, 40  $\mu$ m brain slices from animals perfused  
199 with 4% paraformaldehyde (in PBS, pH-7.4) were cut with a cryostat (Leica CM 1800;  
200 Leica Canada) and used for immunohistochemistry (IHC). Because selective and specific  
201 Syt4, Syt7 and VMAT2 antibodies were all from the same host species (rabbit), a double  
202 labeling protocol (Jackson ImmunoResearch) with monovalent Fab fragments was used.  
203 After a PBS wash, the tissue was permeabilized, nonspecific binding sites blocked (goat  
204 serum 5%) and incubated overnight at room temperature with the first primary antibody  
205 (rabbit anti-Syt1, anti-Syt4 or anti Syt7 from Synaptic Systems, Germany; 1:1000),  
206 followed by 2h with a first secondary antibody (rabbit Alexa Fluor-488-conjugated,  
207 1:500, Invitrogen, Canada). A blocking step of antigenic sites from the first primary and  
208 secondary antibody combination was performed thereafter by a 3h incubation with  
209 normal serum from the same species as the primary antibody, followed by a blocking  
210 solution (goat block: PBS, Triton X100 0.3%, bovine serum albumin 5%) with 50  $\mu$ g/mL  
211 of unconjugated monovalent Fab fragments against the host of the primary antibody,  
212 overnight, at room temperature and under agitation. Slices were then washed, and a

213 second labeling was performed with a second primary antibody (rabbit anti-VMAT2,  
214 1:1000, gift of Dr. Gary Miller, Colombia University), and a second secondary antibody  
215 (rabbit Alexa Fluor-546–conjugated, 1:500, Invitrogen). For each IHC staining, a control  
216 group was included, with the full protocol except for omission of the second primary  
217 antibody. A classical immunostaining protocol was used for the knockout validation of  
218 Syt4 and Syt7 antibodies (**Fig. S2**), using mouse anti-tyrosine hydroxylase (Millipore  
219 Sigma; 1:1000) and rabbit anti-Syt4 or anti-Syt7 primary antibodies (Synaptic Systems;  
220 1:1000) subsequently detected using Alexa Fluor-488-conjugated and Alexa Fluor-546-  
221 conjugated secondary antibodies (Invitrogen; 1:500).

## 222 **Confocal Imaging**

223 Images were acquired using an Olympus Fluoview FV1000 point-scanning confocal  
224 microscope (Olympus, Canada) with a 60x oil-immersion objective (NA 1.35). Images  
225 acquired using 488nm and 546 nm laser excitation were scanned sequentially to prevent  
226 non-specific bleed-through signal. All image analysis was performed using ImageJ  
227 (National Institutes of Health) software.

## 228 **Reverse Transcriptase-quantitative PCR**

229 We used RT-qPCR to quantify the amount of mRNA encoding Syt1, 4, 5, 7 and 11 in  
230 brain tissue from P70 Syt4<sup>+/+</sup> and Syt4<sup>-/-</sup> mice and P70 Syt7<sup>+/+</sup> and Syt7<sup>-/-</sup> mice. Adult  
231 whole brains were harvested and homogenized in Trizol solution, then RNA extraction  
232 was performed using RNeasy Mini Kit (Quiagen, Canada) according to the  
233 manufacturer's instructions. The concentration and purity of the RNA from DA neurons  
234 were determined using a NanoDrop 1000 (Thermo Scientific, Waltham, MA USA). Total  
235 purified RNA (40 ng) was reverse-transcribed in a total of 20 µl including 1 µl of dNTP,

236 1 µl of random hexamer, 4 µl of 5X buffer 5X, 2 µl of dithiothreitol (DTT), 1 µl of  
237 RNase-Out and 1 µl of the Moloney Murine Leukemia Virus reverse transcriptase  
238 enzyme (MML-V, Invitrogen). Quantitative PCR was carried out in a total of 15µl  
239 consisting of 3µl cDNA, 7.5µl SYBER green PCR master mix (Quanta Biosciences,  
240 USA), 10µM of each primer, completed up to 15µl with RNA-free water. qPCR was  
241 performed on a Light Cycler 96 machine (Roche, Canada) using the following procedure:  
242 10 min at 95°C; 40 cycles of 30s at 95°C, 40s at 57°C and 40s at 72°C; 1 cycle of 15s at  
243 95°C, 15s at 55°C and 15s at 95°C. Results were analysed with Light Cycler 96 software  
244 and Excel. The efficiency of the reaction ( $E=10^{(-1/\text{slope})} - 1$ ) was calculated from the slope  
245 of the linear relationship between the log values of the RNA quantity and the cycle  
246 number (Ct) in a standard curve. Calculation of relative mRNA levels was performed by  
247 using the  $2^{(-\text{DDCt})}$  formula<sup>41</sup>, where the Ct value of the mRNA level for Syt1, 4, 5, 7  
248 and 11 was normalized to the Ct value of GAPDH in the same sample. Ct values used  
249 were the mean of duplicate repeats. Melt-curves of tissue homogenate indicated specific  
250 products after Syt1, 4, 5, 7 and 11 qPCR mRNA amplification, attesting of the adequate  
251 quality of the primers chosen (not shown). Primers were designed with the Primers 3 and  
252 Vector NTI software and were synthesized by Alpha DNA (Montreal, QC). Primers for  
253 qPCR were as follows: Syt1: 5' GTGGCAAGACACTGGTGAT 3' and 5'  
254 CTCAGGACTCTGGAGATCG 3' ; Syt4: 5' CACTTCCCTCACGTCAGAGGAG 3'  
255 and 5' GCAAGGAGAGCTCTTGGATGTG 3'; Syt5: 5'  
256 GTCCCATACGTGCAACTAGG 3' and 5' AACGGAGAGAGAAGCAGATG 3'; Syt7:  
257 5' CCAGACGCCACACGA 3' and 5' CCTTCCAGAAGGTCT 3'; Syt11: 5'  
258 CTTGTATGGCGGGGTCTTGT 3' and 5' ATACGCCCCAGCTTTGATGA 3' and

259 GAPDH: 5' GGAGGAAACCTGCCAAGTATGA 3' and 5'  
260 TGAAGTCGCAGGAGACAACC 3'. Primers were tested by comparing primers  
261 sequences to the nucleotide sequence database in GenBank using BLAST  
262 ([www.ncbi.nlm.nih.gov/BLAST/](http://www.ncbi.nlm.nih.gov/BLAST/)).

263

## 264 **Statistics**

265 Data are presented as mean +/- SEM. The level of statistical significance was established  
266 at  $p < 0.05$  in one-way ANOVAs with appropriate post-hoc tests and two-tailed t tests,  
267 performed with Prism 8 software (GraphPad, \* $p < 0.05$ , \*\* $p < 0.01$ , \*\*\* $p < 0.001$ , #  $p <$   
268  $0.0001$ ).

269

## 270 RESULTS

271

### 272 D2 autoreceptors and DAT limit the extent of somatodendritic dopamine release in 273 mouse VTA slices

274 The difficulty to reliably detect STD DA release in mouse rodent slices has  
275 greatly slowed progress in better understanding the mechanisms and roles of this form of  
276 DA release. We therefore first aimed to optimize its detection in mouse VTA slices by  
277 comparing different modes of stimulation and physiological parameters that may limit its  
278 extent.

279 Previous studies performed in brain slices or *in vivo* typically triggered STD DA  
280 release using extracellular electrical stimulation<sup>42-44</sup>. A downside of this approach is that  
281 it non-selectively depolarizes local afferent terminals and the cell bodies of local GABA  
282 and glutamate neurons in addition to DA neurons. In recent years, optical stimulation  
283 using channelrhodopsin-2 (ChR2) or other opsin variants has increasingly been used to  
284 obtain more selective activation of DA neuron axons<sup>45</sup>. However, to this date, this  
285 approach has not been used to selectively trigger STD DA release in FSCV experiments.  
286 We first evaluated whether optogenetic stimulation of DA neurons might be more  
287 effective to trigger STD DA release or produce more stable release (**Fig. 1A, 1B**).

288 We compared single pulse optical (1 ms, 470 nm) and electrical (1 ms, 400  $\mu$ A)  
289 stimulation. Recordings were performed in the VTA of DAT<sup>IRESc<sup>re</sup></sup>/Ai32 mice, in which  
290 ChR2 is conditionally expressed in all DA neurons, and in DAT<sup>IRESc<sup>re</sup></sup> heterozygote mice  
291 injected in the VTA with a floxed hChR2-EYFP AAV construct. Neither stimulation

292 conditions, either in normal ACSF or in the presence of DAT (nomifensine, 5  $\mu$ M) and  
293 D2 receptor blockade (sulpiride, 5  $\mu$ M) yielded detectable evoked elevations of  
294 extracellular DA (**Fig. 1C, 1D**). However, the use of pulse trains (30 pulses at 10 Hz) in  
295 the presence of nomifensine and sulpiride allowed reliable detection of STD DA release  
296 in VTA slices, both for electrical stimulation (average peak DA levels of 340 nM +/- 28  
297 nM in DAT<sup>IREScrc</sup>/Ai32 mice [n = 15] and 333 nM +/- 32 nM in DAT<sup>IREScrc</sup> mice infected  
298 with ChR2 AAV [n = 10]) and for optical stimulation (average peak DA levels at 187 nM  
299 +/- 17 nM in DAT<sup>IREScrc</sup>/Ai32 mice [n = 15] and 220 nM +/- 37 nM in DAT<sup>IREScrc</sup> mice  
300 infected with ChR2 AAV [n = 10]). Although peak levels of activity-dependent STD DA  
301 release in the two strains of mice tended to be higher with electrical compared to optical  
302 stimulation, the difference between the two modes of stimulation was not significantly  
303 different (**Fig. 1C, 1D**, right bar graphs).

304 Reuptake through the DAT and the D2 autoreceptor are two well-known  
305 regulators of extracellular DA levels and DA release<sup>46-48</sup>. We next examined the effect of  
306 DAT and D2 receptor blockade individually to determine whether a combined block of  
307 reuptake and autoreceptor function was required to reliably detect STD DA release in  
308 response to electrical train stimulation. Each recording was performed after 15 min of  
309 nomifensine or sulpiride or a combination of the two. Baseline levels of evoked DA in  
310 the absence of antagonist were very small, but still reliably detectable (49 nM +/- 6 nM).  
311 Blockade of DAT or D2 receptors individually, caused a significant increase in the  
312 maximal amplitude of evoked STD DA release in the VTA (+296% +/- 42% for  
313 nomifensine alone [n = 6], +210% +/- 28% for sulpiride alone [n = 6]), while a  
314 combination of the two drugs caused a cumulative increase of 500% +/- 51% [n = 12],

315 thus demonstrating that the two manipulations were mostly additive and that a combined  
316 blockade of both membrane proteins allowed to maximally increase the detected signal.

317

### 318 **Optogenetic stimulation reveals strong use-dependent attenuation of evoked STD** 319 **DA release in the VTA**

320 In previous work evaluating STD DA release using FSCV in guinea pig brain  
321 slices, repeated stimuli were found to cause stimulation-dependent attenuation<sup>5</sup>. This  
322 represents a major limiting factor to further examine the mechanisms of this form of  
323 release. Using optical train stimulation in the presence of nomifensine and sulpiride, we  
324 therefore evaluated the stability of STD DA release in response to a series of 7  
325 consecutive stimuli with an interstimulus interval of 5 min. STD DA overflow evoked by  
326 optical stimulation showed a robust and progressive decrease in peak amplitude in  
327 response to repeated stimuli (**Fig. 2A**). By the end of the stimulation protocol, evoked  
328 STD DA release decreased by approximately 50% in DAT<sup>IRESc<sup>re</sup></sup>/Ai32 mice and by  
329 approximately 40% in virally transduced DAT<sup>IRESc<sup>re</sup></sup> mice. Compatible with the  
330 possibility that this decrement was due to rundown of releasable pools of DA, a 20 min  
331 delay before a final stimulation revealed a clear partial recovery. Strikingly, electrical  
332 stimulation failed to cause a similarly extensive rundown of STD DA, with only a  
333 modest, non-significant decrease of less than 20% detected by the last of 7 stimuli (**Fig.**  
334 **2B**). Although speculative, this lack of rundown in response to electrical stimulation  
335 could be due to the recruitment of afferent fibers that secrete neuromodulators able to  
336 maintain vesicular DA stores for longer periods of time. Due to this favorable



337 characteristic of electrical stimulation on the stability of STD DA release, all further  
338 experiments were performed with this mode of stimulation.

339

#### 340 **DA release in the VTA and striatum exhibit similar calcium dependency**

341 As we aimed to examine the role of Syt calcium sensors in STD DA release and in  
342 the face of conflicting previous results regarding the extent to which STD DA release  
343 depends upon extracellular calcium levels in comparison with axonal release<sup>24,49</sup>, we next  
344 evaluated the release of DA at 0, 0.5 and 2.4 mM of extracellular calcium in both the  
345 dorsal striatum (axonal release) and VTA (**Fig. 3A**). As expected, based on previous  
346 results<sup>13</sup>, no release was detected in the striatum at 0 mM and 0.5 mM calcium, neither in  
347 response to single pulses or to trains (n = 13 slices/7 mice) (**Fig. 3B**).

348 In the VTA, STD DA release, here again triggered in the presence of  
349 nomifensine/sulpiride (5  $\mu$ M), was also undetectable at 0 mM extracellular calcium (n =  
350 13 slices/7 animals), but readily detectable at 0.5 mM (n = 16 slices/10 mice) (**Fig. 3C**),  
351 as previously described in the guinea pig<sup>49</sup>. Evoked STD DA release at this concentration  
352 of calcium was however only 19% of the signal detected at 2.4 mM calcium (76 nM +/-  
353 10 nM, compared to 388 nM +/- 39 nM) (**Fig. 3C, 3D**). Recordings performed in striatal  
354 slices in the presence of nomifensine and sulpiride similarly revealed detectable DA  
355 release at 0.5 mM calcium (**Fig. 3B**) (1.1  $\mu$ M +/- 0.17  $\mu$ M, n = 13 slices/7 mice). This  
356 represents 16 % of the DA signal detected at 2.4 mM calcium (7  $\mu$ M +/- 0.87  $\mu$ M) (**Fig.**  
357 **3B, 3D**). Therefore, under the same experimental conditions, with no influence of DA

358 uptake and D2 autoreceptor activation, evoked STD and axonal DA release show a  
359 similar calcium dependency. All further experiments were performed at 2.4 mM calcium.

### 360 **STD DA release is more resilient than axonal release in a Parkinson's disease model**

361 The differential properties of axonal and STD DA release might in part be  
362 involved in explaining the differential impairment of these two forms of release in PD.  
363 We therefore examined the resilience of STD DA release in the intrastriatal 6-  
364 hydroxydopamine (6-OHDA) model, often used to study adaptation of the DA system in  
365 the context of PD progression. Interestingly, previous work performed in the rat showed  
366 that extracellular DA levels in the SNc, as determined by *in vivo* microdialysis, are not  
367 altered several weeks after a 6-OHDA lesion in the medial forebrain bundle (MFB),  
368 while a major loss of DA content was seen in the striatum<sup>33</sup>. We used a protocol adapted  
369 from Stott and Barker<sup>34</sup>, who observed that within hours, intra-striatal 6-OHDA (5  
370  $\mu\text{g}/\mu\text{L}$ , 2 $\mu\text{L}$ ) can impact TH+ fibers in the striatum, while the impact at the STD  
371 compartment is delayed for several days post-surgery, even if approximately 50% of DA  
372 neurons degenerate by 12 days. We unilaterally injected saline or 6-OHDA in the dorsal  
373 striatum of 6-7-week-old DAT<sup>IRESc<sup>re</sup></sup> mice and measured axonal and STD DA release by  
374 FSCV 24h or 14 days after the injections (**Fig.4A**).

375 We found at 1-day post-injection a >99% decrease of electrically evoked DA  
376 overflow in the dorsal striatum, confirming the robust and acute effect of 6-OHDA on  
377 DA axonal fibers [n = 12 slices/6 mice] (**Fig.4B**). This abolition of axonal DA release  
378 was also maintained after 14 days [n= 10 slices/5 mice]. Intriguingly, a small decrease of  
379 evoked axonal DA overflow was also detected in the contralateral striatum at day-1 (1.1  
380  $\mu\text{M} \pm 0.06 \mu\text{M}$  vs 1.39  $\mu\text{M} \pm 0.08 \mu\text{M}$  at 14 days), something that was not observed in

381 saline-injected control mice ( $1.3 \mu\text{M} \pm 0.09 \mu\text{M}$  vs  $1.28 \mu\text{M} \pm 0.07 \mu\text{M}$  at 14 days).  
382 As expected, there was otherwise no impact of the injection itself on DA overflow, has  
383 seen in all saline treated animals [ $n = 12$  slices/6 mice for each time point] (**Fig.4C and**  
384 **E**).

385 In a sharp contrast, 1 day after 6-OHDA, STD DA release at the level of the SNc  
386 was not reduced, but rather significantly higher in the 6-OHDA lesioned hemisphere  
387 ( $0.27 \mu\text{M} \pm 0.03 \mu\text{M}$ , [ $n = 13$  slices/6 mice]) compared to the contralateral side  
388 ( $0.18 \mu\text{M} \pm 0.03$ ) (**Fig.4D**). At 14 days, a stage at which it is expected that  
389 neurodegeneration has reached the STD compartment and approximately half of SNc DA  
390 neurons have degenerated<sup>34</sup>, only a tendency of a decrease of DA release in the lesioned-  
391 SNc ( $0.12 \mu\text{M} \pm 0.015$ , [ $n = 10$  slices/5 mice]) was observed compared to the  
392 contralateral side ( $0.17 \mu\text{M} \pm 0.034 \mu\text{M}$ ), a change that was not significant. There were no  
393 significant changes in STD DA release in the VTA region at 1 or 14 days after 6-OHDA.  
394 Altogether these data indicate that while axonal release is very sensitive to the toxic  
395 effects of a single 6-OHDA injection, STD release is strikingly more resilient.

#### 396 **Dopamine neurons express the calcium-sensors synaptotagmin 1, 4 and 7**

397 Because Syt1 is the main calcium sensor of axonal release<sup>19,37</sup>, and Syt4 and Syt7  
398 were previously suggested to be critical for STD DA release based on *in vitro*  
399 experiments<sup>19</sup>, we next evaluated the presence and subcellular localization of these Syt  
400 isoforms in DA neurons *in vivo* in the mouse brain.

401 Immunohistochemistry was used to test the hypothesis that Syt4 and Syt7 are  
402 present within the cell body and dendrites of DA neurons in close association with

403 compartments containing the vesicular monoamine transporter VMAT2. Due to the  
404 impossibility to obtain suitable VMAT2 and Syt antibodies produced in different species,  
405 we took advantage of a double labelling protocol allowing the use of two primary  
406 antibodies from the same species (rabbit) (**Fig. 5A**). The approach was validated by the  
407 observation that in control experiments in which the second primary antibody was  
408 omitted, no signal was detected for the second antigen, demonstrating that the second  
409 secondary antibody was unable to bind to the first primary antibody after the blocking  
410 step. Immunoreactivity for Syt4 showed a clear somatic localization in DA neurons, with  
411 a notable overlap with VMAT2 (**Fig. 5B**), with little if any signal in terminals in the  
412 striatum. Confirming the specificity of the antibody, signal was absent from Syt4 KO DA  
413 neurons (**Fig. S2A**). Syt7 immunoreactivity was found in both the STD region of DA  
414 neurons as well as in their terminal region in the striatum (**Fig. 5D**). Syt7  
415 immunoreactivity was strongly reduced in Syt7 KO tissue, although some background  
416 signal was still detectable (**Fig. S2B**), suggesting sub-optimal specificity. Finally, Syt1  
417 was undetectable in the soma and dendrites of DA neurons, but highly expressed in the  
418 terminals in the striatum, as expected (**Fig. 5D**).

419

#### 420 **Double knockout of Syt4 and Syt7 strongly reduces STD DA release**

421         Considering the expression of Syt4 and Syt7 in DA neurons and their apparent  
422 localization in the STD compartment of these neurons, we hypothesized that evoked STD  
423 DA release should be reduced in constitutive Syt4 or Syt7 KO mice. These experiments  
424 were performed using electrical train stimulation, in the presence of nomifensine and  
425 sulpiride. To obtain a thorough understanding of the individual roles of Syt4 and Syt7,

426 wild-type, heterozygous and KO littermates were compared, and recordings were  
427 performed for each mouse in the dorsal striatum, the ventral striatum (nucleus accumbens  
428 core and shell) and the VTA. These experiments revealed that axonal and STD DA  
429 release in the VTA were not significantly reduced in Syt4 or Syt7 KO mice (**Fig. 6A,**  
430 **6B**). The absence of effect of Syt4 or Syt7 KO on STD DA release could be due to the  
431 ability of one isoform to compensate for the other in the STD compartment, with or  
432 without compensatory upregulation of the expression of the other isoform. Using qRT  
433 PCR in whole brain homogenates, we found that the total levels of Syt7 mRNA in Syt4  
434 KO mice were unchanged, as were the levels of Syt4 mRNA in Syt7 KO mice (**Fig. S2B,**  
435 **S2D**).

436 To examine if functional compensation can explain the lack of change in STD DA  
437 release in the single KO mice, we next crossed these two mouse lines to generate a  
438 double Syt4 and Syt7 KO. As controls, Syt4<sup>-/-</sup> ; Syt7<sup>+/-</sup> and Syt7<sup>-/-</sup> ; Syt4<sup>+/-</sup> animals were  
439 also used for the FSCV recordings. Once again, no significant differences were found in  
440 the dorsal and ventral striatum (**Fig. 6C**). The amount of DA released in the VTA of Syt4<sup>-/-</sup>  
441 ; Syt7<sup>+/-</sup> (0.334  $\mu$ M +/- 0.04  $\mu$ M ; n = 6 mice) was similar to controls from the Syt4 and  
442 Syt7 individual KO mouse lines (respectively 0.341  $\mu$ M +/- 0.044  $\mu$ M ; n = 8 mice and  
443 0.32  $\mu$ M +/- 0.046  $\mu$ M ; n = 5 mice). However, in Syt4<sup>-/-</sup> ; Syt7<sup>-/-</sup> animals, we found a  
444 robust and significant  $\approx$ 50% decrease of STD DA release (0.162  $\mu$ M +/- 0.014  $\mu$ M ; n = 9  
445 mice). Interestingly, the Syt7<sup>-/-</sup> ; Syt4<sup>+/-</sup> animals also showed a systematic decrease of  
446 STD DA release of about  $\sim$ 50% (0.175  $\mu$ M +/- 0.016  $\mu$ M ; n = 8 mice). Together these  
447 results argue that both Syt4 and Syt7 isoforms contribute to STD DA release, with  
448 functional compensation of one isoform by the other. These data also suggest a more

449 critical role of Syt7 compared to Syt4 because the presence of only one Syt7 allele is  
450 sufficient to support STD DA release in the absence of Syt4.

451

## 452 **Discussion**

### 453 **Characteristics of STD DA release**

454 In the present study, we performed the first characterization of optically evoked  
455 STD DA release in the mouse mesencephalon using a combination of optogenetics and  
456 FSCV and compared its characteristics to release evoked by electrical stimulation. As  
457 previously reported by others, we found that the absolute levels of evoked DA overflow  
458 detected in this region were low compared to levels detected in the terminal region in the  
459 striatum. Furthermore, we found that a robust STD DA release signal could only be  
460 detected using pulse-train stimulation (**Fig.1**). Blocking DA reuptake and D2  
461 autoreceptor function using nomifensine and sulpiride caused a 5-fold increase in peak  
462 signal amplitude, thus making detection of this signal straightforward and reproducible.

463 Using a repeated stimulation protocol, we found that repeated optical stimulation  
464 with a 5 min interval produces a strong rundown of STD DA release, whereas no such  
465 attenuation was seen with electrical stimulation (**Fig.2**). This finding is compatible with  
466 previous results reporting a similar rundown of optically-evoked axonal DA release in the  
467 striatum<sup>45</sup>. It is therefore conceivable that the decrease observed with optical stimulation  
468 results from a low reserve capacity of STD DA release due to limited vesicular reserve  
469 pools in the soma and dendrites of DA neurons. It is equally possible that in response to  
470 electrical stimulation, a similar decrement is not observed because this form of

471 stimulation recruits neuromodulatory mechanisms that result from activation of afferent  
472 terminals releasing 5-HT, NE, acetylcholine, glutamate, GABA or neuropeptides onto  
473 DA neurons<sup>45,50</sup>. Further experiments will be required to test this hypothesis.

474 Our experiments comparing the impact of changes in extracellular calcium levels  
475 of STD and axonal DA release argue for the existence of a similar calcium dependency  
476 for both forms of release (**Fig. 3**). These findings are compatible with previous results  
477 obtained in mice, which were performed using patch-clamp recordings and the  
478 measurement of STD D2 receptor<sup>24</sup>. It is possible that a different conclusion was reached  
479 in guinea pig brain slices because some aspect of the STD DA release mechanism is  
480 different in that species<sup>13</sup>. Another possibility is that a small component of axonal DA  
481 release is also included in the signal detected in the VTA. This possibility has been raised  
482 previously<sup>49</sup>, but the available anatomical data actually suggests that DA containing  
483 axonal varicosities are extremely scarce in the VTA<sup>51,52</sup>, except in the context of  
484 compensatory axonal sprouting associated with partial lesions<sup>53</sup>. It would nonetheless be  
485 useful to revisit this question with additional anatomical work in the future to provide  
486 more quantitative data.

#### 487 **Implications of STD DA release in PD**

488 The differential resilience of STD DA release in comparison to that of terminal  
489 DA release is of particular interest because a major hypothesis of PD progression  
490 proposes that loss of function begins at the axon terminal level, only later progressing to  
491 loss of cell bodies (i.e. the dying back hypothesis of PD)<sup>32,54</sup>. In this context, it may be  
492 hypothesised that at early stages of PD, STD DA release may still be functional and  
493 contribute to partial maintenance of DA-dependent regulatory mechanisms in the ventral

494 midbrain. Of relevance, it has been proposed that STD DA release contributes, along with  
495 axonal DA release to motor behaviors<sup>55,56,10,57</sup>. Although a major focus of PD research  
496 has been on restoring DA release in the striatum with L-DOPA treatment<sup>58</sup> or with  
497 transplantation of mesencephalic tissue<sup>59</sup>, the possible contribution of STD DA release to  
498 functional adaptation or perturbation of basal ganglia circuit function in PD has received  
499 little attention until now. Here we thus evaluated how STD DA release changes over time  
500 after intra-striatal 6-OHDA, used to model PD axonal dying-back. We observed that  
501 axonal release is very sensitive to the neurotoxic effect of 6-OHDA, as previously  
502 known. In comparison, we found that STD DA release persists with no major decrement  
503 for up to 14 days after the lesion, thus reflecting its high level of resilience. This  
504 observation is in agreement with previous data from microdialysis experiments  
505 measuring basal DA levels in the mesencephalon of 6-OHDA-lesioned rats<sup>33</sup>. Our finding  
506 of an increase in STD DA release in the SNc at 1 day after the lesion further suggests that  
507 at early stages of PD pathophysiology, the loss of axonal DA signaling in the dorsal  
508 striatum could constitute a signal for SNc neurons to upregulate their STD DA release as  
509 a possible compensatory mechanism to sustain normal functions. Although this  
510 hypothesis is speculative and will require further experiments to clarify the full time-  
511 course and the mechanisms involved, these findings raise interest in further investigating  
512 STD DA release and its plasticity in more disease-relevant PD models. It would also be  
513 of interest to disentangle the possible contributions of STD and axonal DA release in the  
514 VTA after partial lesions because of the possible appearance of aberrant compensatory  
515 axonal fibers in the mesencephalon in such models<sup>53</sup>.

#### 516 **Contribution of Syt4 and Syt7 to STD DA release**



517           Finally, we examined the contribution of the synaptotagmin isoforms Syt4 and  
518 Syt7 to STD DA release. Acute downregulation of both isoforms has previously been  
519 shown *in vitro* to severely reduce STD DA release, with no similar effect of Syt1  
520 downregulation<sup>19</sup>. Although our present immunostaining results provide further support  
521 for the presence of these proteins in the STD compartment of DA neurons, we failed to  
522 detect any significant decrease in evoked STD DA release in VTA slices prepared from  
523 individual constitutive Syt4 or Syt7 KO mice. It is possible that contrarily to acute  
524 downregulation with siRNAs, constitutive gene deletion may lead to homeostatic  
525 compensation leading to elevated levels of Syt4 in Syt7 KO mice and vice versa. It is also  
526 possible that *in vitro* models lack homeostatic compensatory mechanisms that are  
527 recruited *in vivo*. Our experiments quantifying Syt4 and Syt7 total mRNA levels failed to  
528 provide support for such a compensation. Another possibility is therefore that Syt4 and  
529 Syt7 play similar roles in supporting STD DA release and that one can compensate for  
530 absence of the other in the context of constitutive gene deletion. The robust decrease in  
531 activity-dependent STD DA release in Syt4/Syt7 double KO mice supports this  
532 interpretation. In Syt4<sup>-/-</sup> ; Syt7<sup>-/-</sup> mice or Syt7<sup>-/-</sup> ; Syt4<sup>+/-</sup> mice, we observed a two-fold  
533 decrease of STD DA release. This decrease was surprisingly not found in Syt4<sup>-/-</sup> ; Syt7<sup>+/-</sup>  
534 mice, strongly suggesting that Syt7 plays a particularly important role and that a single  
535 allele of Syt7 is sufficient to sustain STD DA release in the absence of Syt4.

536           Considering that in the absence of both Syt4 and Syt7, approximately half of total  
537 STD DA release levels remain, we hypothesise that other calcium sensors are also  
538 involved. One possible candidate is Syt11. This isoform is interesting because like Syt4,  
539 it has been reported to be present in the STD compartment of neurons<sup>60</sup>. Like Syt4, it also

540 contains a natural mutation in one of its C2 calcium-binding domain, compatible with a  
541 regulatory role in exocytosis rather than a classical calcium-sensing role<sup>61</sup>. Finally, like  
542 Syt4, Syt 11 is a risk locus for PD<sup>62,63</sup>, and is a substrate of the E3 ubiquitin ligase parkin,  
543 linked to early-onset familial forms of PD. Intriguingly, Syt11 overexpression in the SNc  
544 has been reported to cause a decrease of DA release in the striatum<sup>64</sup>. Finally, the main  
545 synaptotagmin isoform Syt1 might also be of interest, as it was recently demonstrated as  
546 the main calcium sensor for fast striatal DA release<sup>37</sup>. We have not found strong evidence  
547 for localization of Syt1 in the STD domain of DA neurons, but further examination of  
548 this possibility with higher resolution techniques would be warranted. A broader  
549 evaluation of the contribution of other synaptic and exocytosis proteins in STD DA  
550 release would also be useful. Interestingly, evoked STD DA release measured as D2-  
551 IPSCs was recently reported to be abolished in mice with conditional deletion of the  
552 active zone protein RIM, while spontaneous release remained intact<sup>65</sup>. However, the  
553 subcellular localization of RIM in the STD compartment of DA neurons is currently  
554 undetermined.

555       Together our work provides a new perspective on the mechanisms of STD DA  
556 release and renews the interest in better understanding its roles in normal brain function  
557 and in diseases such as PD.

558 **FIGURE LEGENDS**

559 **Figure 1: Optogenetic and electrical stimulation trigger comparable levels of**  
560 **somatodendritic dopamine release in mouse VTA slices. (A) Animal models used for**  
561 *optogenetic experiments. We either used a mouse line expressing a floxed version of*  
562 *light-activated channelrhodopsin (ChR2) crossed with a DA-specific Cre driver line*  
563 *(DAT<sup>iresCre</sup>) or performed stereotaxic injections of AAV5-EF1a-DIO-hChR2(H134R)-*  
564 *eYFP virus in the VTA of DAT<sup>iresCre</sup> mice to selectively express ChR2 in DA neurons. (B)*  
565 *Fast Scan Cyclic Voltammetry was used to monitor DA levels. A voltage ramp of -400 to*  
566 *1000 mV vs Ag/AgCl at 300 V/s was used, with a 100 ms sampling interval. Recordings*  
567 *were made in coronal slices containing the VTA and DA release was triggered by either*  
568 *optical stimulation with a 470 nm blue light LED or with a bipolar stimulating electrode.*  
569 **(C) Top, representative traces of responses obtained in the VTA with 1 pulse (1ms) of**  
570 *blue light («single pulse») or a pulse-train of stimulation (30 pulses of 1 ms at 10 Hz), in*  
571 *the presence of normal ACSF or ACSF + a DAT blocker (nomifensine, 5  $\mu$ M) and an*  
572 *antagonist of D2 autoreceptors (sulpiride, 5  $\mu$ M). Bottom, voltammograms of the*  
573 *representative traces. (D) Top, representative traces of responses obtained in the dorsal*  
574 *striatum with 1 electrical pulse (1 ms, 400  $\mu$ A) or a pulse-train (30 electrical pulses of 1*  
575 *ms at 10 Hz, 400  $\mu$ A), in the presence of ACSF or ACSF + 5  $\mu$ M nomifensine/sulpiride.*  
576 *Bottom, voltammograms of the representative traces. (E) Effect of nomifensine/sulpiride*  
577 *on STD DA release measured by pulse-train electrical stimulation.*

578

579

580 **Figure 2: Optogenetic stimulation reveals strong use-dependent attenuation of**  
581 **evoked STD DA release in the VTA. (A)** Average [DA]<sub>o</sub> peaks normalized to the first  
582 stimulation in the VTA of AI32 and injected DAT<sup>IREScree</sup> mice evoked by optical stimulation  
583 trains (30 pulses of 1 ms at 10 Hz, 470 nm blue light LED). **(B)** Same with pulse-train  
584 electrical stimulation (30 pulses of 1 ms at 10 Hz, 400  $\mu$ A). Each record was obtained in  
585 aCSF + 5  $\mu$ M nomifensine/sulpiride with 1 recording site per slice; inter-stimulus  
586 interval between stims 1-7 = 5 min, inter-stimulus interval between stim 7 and 8 = 20  
587 min. Error bars represent +/- S.E.M. and the statistical analysis was carried out by a 1-  
588 way ANOVA followed by a Dunnett test (ns, non-significant; \*,  $p < 0.05$ ; \*\*,  $p < 0.01$ ;  
589 \*\*\*,  $p < 0.001$ ; \*\*\*\*,  $p < 0.0001$ ). The bold number represents the number of slices  
590 recorded / number of animals used.

591 **Figure 3: Somatodendritic and axonal dopamine release exhibit a similar calcium**  
592 **dependency. (A)** Protocol used for FSCV recordings. **(B)** Schematic representation of a  
593 striatal slice and average of [DA]<sub>o</sub> peaks obtained with single or pulse-train stimulations  
594 at 0, 0.5 and 2.4 mM of extracellular calcium in the aCSF, with or without addition of 5  
595  $\mu$ M of nomifensine/sulpiride. **(C)** Schematic representation of a VTA slice and average  
596 [DA]<sub>o</sub> peaks obtained with pulse-train stimulations at 0, 0.5 and 2.4 mM of extracellular  
597 calcium in the aCSF containing 5  $\mu$ M of nomifensine/sulpiride. **(D)** Average [DA]<sub>o</sub> peaks  
598 normalized to 2.4 mM of calcium obtained in the VTA and dorsal striatum (dStr) with  
599 pulse-train stimulation and aCSF containing nomifensine/sulpiride. Representative traces  
600 and voltammograms are shown on the right. Error bars represent +/- S.E.M. The  
601 statistical analysis was carried out by a 1-way ANOVA followed by a Dunnett test (ns,  
602 non-significant; \*\*\*,  $p < 0.001$ ; #,  $p < 0.0001$ ).

603 **Figure 4: STD DA release is more resilient than axonal release in a model of**  
604 **Parkinson's disease related axonal dying-back.**

605 *(A) Protocol used for 6-OHDA experiments. Single doses of 2  $\mu$ l at 5  $\mu$ g/ $\mu$ l (10  $\mu$ g) of 6-*  
606 *OHDA were injected in 6-7 weeks old mice in the dorsal striatum. FSCV experiments*  
607 *were conducted 1 day (1D) or 14 days (14D) after the injections and DA overflow was*  
608 *measured in striatal and mesencephalic slices. (B and C) Average [DA]<sub>o</sub> peaks ( $\mu$ M)*  
609 *obtained in the dorsal striatum of 6-OHDA treated (B) and saline-treated (C) mice. (D*  
610 *and E) Average [DA]<sub>o</sub> peaks ( $\mu$ M) obtained in the mesencephalon of 6-OHDA treated*  
611 *(D) and saline-treated (E) mice. Each recording performed in the striatum was obtained*  
612 *in aCSF with an average of 3 recording sites per hemisphere and single pulse stimulation*  
613 *(400  $\mu$ A, 1 ms). Each recording performed in the SN/VTA was obtained in aCSF + 5  $\mu$ M*  
614 *nomifensine/sulpiride with pulse-train stimulation (30 pulses, 10 Hz, 400  $\mu$ A). Error bars*  
615 *represent +/- S.E.M. The statistical analysis was carried out using a t-test (contralateral*  
616 *vs ipsilateral sides) (ns, non-significant; \*\*\*,  $p < 0.001$ ; #,  $p < 0.0001$ ).*

617

618 **Figure 5: Dopamine neurons express the calcium-sensors synaptotagmin 1, 4 and 7.**

619 *(A) Protocol used for double immunostaining for two primary antibodies from the same*  
620 *host (adapted from a Jackson ImmunoResearch protocol:*  
621 *[https://www.jacksonimmuno.com/technical/products/protocols/double-labeling-same-](https://www.jacksonimmuno.com/technical/products/protocols/double-labeling-same-species-primary)*  
622 *species-primary). Use of normal rabbit serum and unconjugated Fab fragments for*  
623 *blocking after the first secondary. (B) Immunohistochemistry of midbrain and striatal*  
624 *slices of adult DAT<sup>IRScree</sup> heterozygote mice showing colocalization of VMAT2 and either*

625 *Syt1, Syt4 or Syt7 in DAergic neurons. Scale bar = 20 μm. Control images were obtained*  
626 *using the full protocol without the use of the second primary antibody (in the midbrain).*

627

628 **Figure 6: Double KO of Syt4 and Syt7 strongly reduces STD DA release.** (A) Average  
629 [DA]o peaks (μM) obtained in the dorsal striatum, ventral striatum and VTA of Syt4  
630 constitutive knock-out mice bred from heterozygous crosses. (B) Same for the constitutive  
631 Syt7 knock-out mice. (C) Same for double Syt4/Syt7 KO mice (Syt4<sup>-/-</sup> ; Syt7<sup>-/-</sup>) and  
632 heterozygotes control animals (Syt4<sup>-/-</sup> ; Syt7<sup>+/-</sup> and Syt7<sup>-/-</sup> ; Syt4<sup>+/-</sup>). Each recording from  
633 the VTA was obtained in aCSF + 5 μM nomifensine/sulpiride with 2 recording sites per  
634 slice and pulse-train stimulation (30 pulses, 10 Hz, 400 μA). Error bars represent +/-  
635 S.E.M. The statistical analysis was carried out by 1-way ANOVA followed by a Tukey test  
636 (ns, non-significant; \*\*\*,  $p < 0.001$ ; #,  $p < 0.0001$ ). The bold number represents the  
637 number of slices recorded / number of animals used.

638

639 **Supplementary figure 1: Knockout validation of Syt4 and Syt7 antibodies** (A) TH and  
640 Syt4 immunostaining of adult Syt4 WT (+/+) and KO (-/-) mesencephalon showing the  
641 specificity of the Syt4 antibody. (B) TH and Syt7 immunostaining of adult Syt7 WT (+/+) and  
642 KO (-/-) mice showing a strong reduction in signal, with some remaining background  
643 signal in the KO animals. The anti-Syt7 antibody was generated against a recombinant  
644 peptide comprising amino acids 46–133 of the unique Syt7 spacer domain<sup>66</sup>. The  
645 targeting vector generated a stop codon after the position coding for amino acid 83 in  
646 exon 4 (Fig. S2), thus making it possible that the remaining signal corresponds to a  
647 short, mutated protein comprising the luminal domain, the transmembrane region, and

648 *only a fraction of the spacer domain. (C) Representative striatal brain slices recorded*  
649 *during FSCV experiments in WT and Syt4 constitutive KO mice. Red arrow indicates*  
650 *obvious neurodevelopmental defects at the level of the anterior commissure and the*  
651 *corpus callosum in KO animals.*

652 ***Supplementary figure 2: No compensatory changes in Syt1, Syt4, Syt7, Syt11 mRNA***  
653 ***in Syt4 and Syt7 constitutive KO mice (A and B) Schematic representation of the***  
654 ***construction of Syt4 and Syt7 KO (-/-) mice. The primers used in qRT PCR for amplifying***  
655 ***the deleted region of each gene are indicated. (C and D) Relative changes of mRNA***  
656 ***levels measured by qRT-PCR in Syt7 (C) and Syt4 (D) KO mice. Ct values (mean of***  
657 ***duplicate repeats) of Syt1, 4, 5, 7 and 11 mRNA levels were normalized to the Ct value of***  
658 ***GAPDH in the same samples. Error bars represent +/- S.E.M. The statistical analysis***  
659 ***was carried out using a t-test (WT vs KO samples) (\*\*,  $p < 0.01$ ; #,  $p < 0.0001$ ).***

660

661 **Author contributions**

662 All authors participated in the design of experiments, data analysis, and interpretation.  
663 CD performed qRT PCR experiments. NF performed double immunostaining  
664 experiments. WK designed genotyping primers. BDL and LET wrote the manuscript.

665 **Conflict of interest**

666 The authors declare that they have no conflict of interest.

667

668 **Acknowledgements**

669 We thank Dr. Wade G Regehr (Harvard Medical School) for providing the Syt7  
670 constitutive KO mice, Dr. Gary Miller (Columbia University) for providing the VMAT2  
671 antibody and Marie-Josée Bourque for managing the mouse colonies and performing  
672 mouse genotyping. This work was funded by the National Sciences and Engineering  
673 Research Council of Canada (NSERC, grant RGPIN-2020-05279) to LET. LET also  
674 received support from the Krembil Foundation, the Brain Canada Foundation and the  
675 Henry and Berenice Kaufmann Foundation. BDL received a graduate student award from  
676 Parkinson Canada. CD received a studentship from the Fonds de la Recherche du Québec  
677 en Santé (FRQS).

678

679

680



681 **REFERENCES**

- 682 (1) Schultz, W. Multiple Dopamine Functions at Different Time Courses. *Annu. Rev.*  
683 *Neurosci.* **2007**, *30* (1), 259–288.  
684 <https://doi.org/10.1146/annurev.neuro.28.061604.135722>.
- 685 (2) Surmeier, D. J.; Graves, S. M.; Shen, W. Dopaminergic Modulation of Striatal  
686 Networks in Health and Parkinson’s Disease. *Curr. Opin. Neurobiol.* **2014**, *29*, 109–  
687 117. <https://doi.org/10.1016/j.conb.2014.07.008>.
- 688 (3) Liu, C.; Kaeser, P. S. Mechanisms and Regulation of Dopamine Release. *Curr.*  
689 *Opin. Neurobiol.* **2019**, *57*, 46–53. <https://doi.org/10.1016/j.conb.2019.01.001>.
- 690 (4) Cragg, S.; Rice, M. E.; Greenfield, S. A. Heterogeneity of Electrically Evoked  
691 Dopamine Release and Reuptake in Substantia Nigra, Ventral Tegmental Area, and  
692 Striatum. *J. Neurophysiol.* **1997**, *77* (2), 863–873.  
693 <https://doi.org/10.1152/jn.1997.77.2.863>.
- 694 (5) Rice, M. E.; Cragg, S. J.; Greenfield, S. A. Characteristics of Electrically Evoked  
695 Somatodendritic Dopamine Release in Substantia Nigra and Ventral Tegmental  
696 Area in Vitro. *J. Neurophysiol.* **1997**, *77* (2), 853–862.  
697 <https://doi.org/10.1152/jn.1997.77.2.853>.
- 698 (6) Elverfors, A.; Jonason, J.; Jonason, G.; Nissbrandt, H. Effects of Drugs Interfering  
699 with Sodium Channels and Calcium Channels on the Release of Endogenous  
700 Dopamine from Superfused Substantia Nigra Slices. *Synap. N. Y. N* **1997**, *26* (4),  
701 359–369. [https://doi.org/10.1002/\(SICI\)1098-2396\(199708\)26:4<359::AID-](https://doi.org/10.1002/(SICI)1098-2396(199708)26:4<359::AID-SYN4>3.0.CO;2-5)  
702 [SYN4>3.0.CO;2-5](https://doi.org/10.1002/(SICI)1098-2396(199708)26:4<359::AID-SYN4>3.0.CO;2-5).

- 703 (7) Beckstead, M. J.; Grandy, D. K.; Wickman, K.; Williams, J. T. Vesicular Dopamine  
704 Release Elicits an Inhibitory Postsynaptic Current in Midbrain Dopamine Neurons.  
705 *Neuron* **2004**, *42* (6), 939–946. <https://doi.org/10.1016/j.neuron.2004.05.019>.
- 706 (8) Cheramy, A.; Leviel, V.; Glowinski, J. Dendritic Release of Dopamine in the  
707 Substantia Nigra. *Nature* **1981**, *289* (5798), 537–543.  
708 <https://doi.org/10.1038/289537a0>.
- 709 (9) Beckstead, M. J.; Grandy, D. K.; Wickman, K.; Williams, J. T. Vesicular Dopamine  
710 Release Elicits an Inhibitory Postsynaptic Current in Midbrain Dopamine Neurons.  
711 *Neuron* **2004**, *42* (6), 939–946. <https://doi.org/10.1016/j.neuron.2004.05.019>.
- 712 (10) Bergquist, F.; Shahabi, H. N.; Nissbrandt, H. Somatodendritic Dopamine Release in  
713 Rat Substantia Nigra Influences Motor Performance on the Accelerating Rod. *Brain*  
714 *Res.* **2003**, *973* (1), 81–91. [https://doi.org/10.1016/S0006-8993\(03\)02555-1](https://doi.org/10.1016/S0006-8993(03)02555-1).
- 715 (11) Andersson, D. R.; Nissbrandt, H.; Bergquist, F. Partial Depletion of Dopamine in  
716 Substantia Nigra Impairs Motor Performance without Altering Striatal Dopamine  
717 Neurotransmission. *Eur. J. Neurosci.* **2006**, *24* (2), 617–624.  
718 <https://doi.org/10.1111/j.1460-9568.2006.04953.x>.
- 719 (12) Falkenburger, B. H.; Barstow, K. L.; Mintz, I. M. Dendrodendritic Inhibition  
720 through Reversal of Dopamine Transport. *Science* **2001**, *293* (5539), 2465–2470.  
721 <https://doi.org/10.1126/science.1060645>.
- 722 (13) Chen, B. T.; Rice, M. E. Novel Ca<sup>2+</sup> Dependence and Time Course of  
723 Somatodendritic Dopamine Release: Substantia Nigra versus Striatum. *J. Neurosci.*  
724 **2001**, *21* (19), 7841–7847. <https://doi.org/10.1523/JNEUROSCI.21-19-07841.2001>.

- 725 (14) Cragg, S. J.; Nicholson, C.; Kume-Kick, J.; Tao, L.; Rice, M. E. Dopamine-  
726 Mediated Volume Transmission in Midbrain Is Regulated by Distinct Extracellular  
727 Geometry and Uptake. *J. Neurophysiol.* **2001**, *85* (4), 1761–1771.  
728 <https://doi.org/10.1152/jn.2001.85.4.1761>.
- 729 (15) Santiago, M.; Westerink, B. H. Characterization and Pharmacological  
730 Responsiveness of Dopamine Release Recorded by Microdialysis in the Substantia  
731 Nigra of Conscious Rats. *J. Neurochem.* **1991**, *57* (3), 738–747.  
732 <https://doi.org/10.1111/j.1471-4159.1991.tb08214.x>.
- 733 (16) Elverfors, A.; Nissbrandt, H. Effects of D-Amphetamine on Dopaminergic  
734 Neurotransmission; a Comparison between the Substantia Nigra and the Striatum.  
735 *Neuropharmacology* **1992**, *31* (7), 661–670. [https://doi.org/10.1016/0028-](https://doi.org/10.1016/0028-3908(92)90144-e)  
736 [3908\(92\)90144-e](https://doi.org/10.1016/0028-3908(92)90144-e).
- 737 (17) Hoffman, A. F.; Lupica, C. R.; Gerhardt, G. A. Dopamine Transporter Activity in  
738 the Substantia Nigra and Striatum Assessed by High-Speed Chronoamperometric  
739 Recordings in Brain Slices. *J. Pharmacol. Exp. Ther.* **1998**, *287* (2), 487–496.
- 740 (18) Fortin, G. D.; Desrosiers, C. C.; Yamaguchi, N.; Trudeau, L. E. Basal  
741 Somatodendritic Dopamine Release Requires Snare Proteins. *J. Neurochem.* **2006**,  
742 *96* (6), 1740–1749. <https://doi.org/10.1111/j.1471-4159.2006.03699.x>.
- 743 (19) Mendez, J. A.; Bourque, M.-J.; Fasano, C.; Kortleven, C.; Trudeau, L.-E.  
744 Somatodendritic Dopamine Release Requires Synaptotagmin 4 and 7 and the  
745 Participation of Voltage-Gated Calcium Channels. *J. Biol. Chem.* **2011**, *286* (27),  
746 23928–23937. <https://doi.org/10.1074/jbc.M111.218032>.

- 747 (20) Yee, A. G.; Forbes, B.; Cheung, P.-Y.; Martini, A.; Burrell, M. H.; Freestone, P. S.;  
748 Lipski, J. Action Potential and Calcium Dependence of Tonic Somatodendritic  
749 Dopamine Release in the Substantia Nigra Pars Compacta. *J. Neurochem.* **2019**, *148*  
750 (4), 462–479. <https://doi.org/10.1111/jnc.14587>.
- 751 (21) Robertson, G. S.; Damsma, G.; Fibiger, H. C. Characterization of Dopamine  
752 Release in the Substantia Nigra by in Vivo Microdialysis in Freely Moving Rats. *J.*  
753 *Neurosci. Off. J. Soc. Neurosci.* **1991**, *11* (7), 2209–2216.
- 754 (22) Rice, M. E.; Richards, C. D.; Nedergaard, S.; Hounsgaard, J.; Nicholson, C.;  
755 Greenfield, S. A. Direct Monitoring of Dopamine and 5-HT Release in Substantia  
756 Nigra and Ventral Tegmental Area in Vitro. *Exp. Brain Res.* **1994**, *100* (3), 395–  
757 406. <https://doi.org/10.1007/bf02738400>.
- 758 (23) Heeringa, M. J.; Abercrombie, E. D. Biochemistry of Somatodendritic Dopamine  
759 Release in Substantia Nigra: An in Vivo Comparison with Striatal Dopamine  
760 Release. *J. Neurochem.* **1995**, *65* (1), 192–200. [https://doi.org/10.1046/j.1471-](https://doi.org/10.1046/j.1471-4159.1995.65010192.x)  
761 [4159.1995.65010192.x](https://doi.org/10.1046/j.1471-4159.1995.65010192.x).
- 762 (24) Ford, C. P.; Gantz, S. C.; Phillips, P. E. M.; Williams, J. T. Control of Extracellular  
763 Dopamine at Dendrite and Axon Terminals. *J. Neurosci. Off. J. Soc. Neurosci.*  
764 **2010**, *30* (20), 6975–6983. <https://doi.org/10.1523/JNEUROSCI.1020-10.2010>.
- 765 (25) Bergquist, F.; Niazi, H. S.; Nissbrandt, H. Evidence for Different Exocytosis  
766 Pathways in Dendritic and Terminal Dopamine Release in Vivo. *Brain Res.* **2002**,  
767 *950* (1–2), 245–253. [https://doi.org/10.1016/s0006-8993\(02\)03047-0](https://doi.org/10.1016/s0006-8993(02)03047-0).

- 768 (26) Ovsepiyan, S. V.; Dolly, J. O. Dendritic SNAREs Add a New Twist to the Old  
769 Neuron Theory. *Proc. Natl. Acad. Sci.* **2011**, *108* (48), 19113–19120.  
770 <https://doi.org/10.1073/pnas.1017235108>.
- 771 (27) Nirenberg, M. J.; Chan, J.; Liu, Y.; Edwards, R. H.; Pickel, V. M. Ultrastructural  
772 Localization of the Vesicular Monoamine Transporter-2 in Midbrain Dopaminergic  
773 Neurons: Potential Sites for Somatodendritic Storage and Release of Dopamine. *J.*  
774 *Neurosci.* **1996**, *16* (13), 4135–4145. [https://doi.org/10.1523/JNEUROSCI.16-13-](https://doi.org/10.1523/JNEUROSCI.16-13-04135.1996)  
775 [04135.1996](https://doi.org/10.1523/JNEUROSCI.16-13-04135.1996).
- 776 (28) Beckstead, M. J.; Ford, C. P.; Phillips, P. E. M.; Williams, J. T. Presynaptic  
777 Regulation of Dendrodendritic Dopamine Transmission. *Eur. J. Neurosci.* **2007**, *26*  
778 (6), 1479–1488. <https://doi.org/10.1111/j.1460-9568.2007.05775.x>.
- 779 (29) Ford, C. P.; Phillips, P. E. M.; Williams, J. T. The Time Course of Dopamine  
780 Transmission in the Ventral Tegmental Area. *J. Neurosci.* **2009**, *29* (42), 13344–  
781 13352. <https://doi.org/10.1523/JNEUROSCI.3546-09.2009>.
- 782 (30) Courtney, N. A.; Mamaligas, A. A.; Ford, C. P. Species Differences in  
783 Somatodendritic Dopamine Transmission Determine D2-Autoreceptor-Mediated  
784 Inhibition of Ventral Tegmental Area Neuron Firing. *J. Neurosci.* **2012**, *32* (39),  
785 13520–13528. <https://doi.org/10.1523/JNEUROSCI.2745-12.2012>.
- 786 (31) Gantz, S. C.; Bunzow, J. R.; Williams, J. T. Spontaneous Inhibitory Synaptic  
787 Currents Mediated by a G Protein-Coupled Receptor. *Neuron* **2013**, *78* (5), 807–  
788 812. <https://doi.org/10.1016/j.neuron.2013.04.013>.

- 789 (32) Cheng, H.-C.; Ulane, C. M.; Burke, R. E. Clinical Progression in Parkinson's  
790 Disease and the Neurobiology of Axons. *Ann. Neurol.* **2010**, *67* (6), 715–725.  
791 <https://doi.org/10.1002/ana.21995>.
- 792 (33) Sarre, S.; Yuan, H.; Jonkers, N.; Van Hemelrijck, A.; Ebinger, G.; Michotte, Y. In  
793 Vivo Characterization of Somatodendritic Dopamine Release in the Substantia  
794 Nigra of 6-Hydroxydopamine-Lesioned Rats. *J. Neurochem.* **2004**, *90* (1), 29–39.  
795 <https://doi.org/10.1111/j.1471-4159.2004.02471.x>.
- 796 (34) Stott, S. R. W.; Barker, R. A. Time Course of Dopamine Neuron Loss and Glial  
797 Response in the 6-OHDA Striatal Mouse Model of Parkinson's Disease. *Eur. J.*  
798 *Neurosci.* **2014**, *39* (6), 1042–1056. <https://doi.org/10.1111/ejn.12459>.
- 799 (35) Dean, C.; Dunning, F. M.; Liu, H.; Bomba-Warczak, E.; Martens, H.; Bharat, V.;  
800 Ahmed, S.; Chapman, E. R. Axonal and Dendritic Synaptotagmin Isoforms  
801 Revealed by a PHluorin-Syt Functional Screen. *Mol. Biol. Cell* **2012**, *23* (9), 1715–  
802 1727. <https://doi.org/10.1091/mbc.E11-08-0707>.
- 803 (36) Ducrot, C.; Bourque, M.-J.; Delmas, C. V. L.; Racine, A.-S.; Bello, D. G.; Delignat-  
804 Lavaud, B.; Lycas, M. D.; Fallon, A.; Michaud-Tardif, C.; Nanni, S. B.; Herborg,  
805 F.; Gether, U.; Nanci, A.; Takahashi, H.; Parent, M.; Trudeau, L.-E. Dopaminergic  
806 Neurons Establish a Distinctive Axonal Arbor with a Majority of Non-Synaptic  
807 Terminals. *bioRxiv* **2020**, 2020.05.11.088351.  
808 <https://doi.org/10.1101/2020.05.11.088351>.
- 809 (37) Banerjee, A.; Lee, J.; Nemcova, P.; Liu, C.; Kaeser, P. S. Synaptotagmin-1 Is the  
810 Ca<sup>2+</sup> Sensor for Fast Striatal Dopamine Release. *eLife* **2020**, *9*, e58359.  
811 <https://doi.org/10.7554/eLife.58359>.

- 812 (38) Ferguson, G. D.; Anagnostaras, S. G.; Silva, A. J.; Herschman, H. R. Deficits in  
813 Memory and Motor Performance in Synaptotagmin IV Mutant Mice. *Proc. Natl.*  
814 *Acad. Sci. U. S. A.* **2000**, *97* (10), 5598–5603.  
815 <https://doi.org/10.1073/pnas.100104597>.
- 816 (39) Chakrabarti, S.; Kobayashi, K. S.; Flavell, R. A.; Marks, C. B.; Miyake, K.; Liston,  
817 D. R.; Fowler, K. T.; Gorelick, F. S.; Andrews, N. W. Impaired Membrane  
818 Resealing and Autoimmune Myositis in Synaptotagmin VII–Deficient Mice. *J. Cell*  
819 *Biol.* **2003**, *162* (4), 543–549. <https://doi.org/10.1083/jcb.200305131>.
- 820 (40) Martel, P.; Leo, D.; Fulton, S.; Bérard, M.; Trudeau, L.-E. Role of Kv1 Potassium  
821 Channels in Regulating Dopamine Release and Presynaptic D2 Receptor Function.  
822 *PloS One* **2011**, *6* (5), e20402. <https://doi.org/10.1371/journal.pone.0020402>.
- 823 (41) Livak, K. J.; Schmittgen, T. D. Analysis of Relative Gene Expression Data Using  
824 Real-Time Quantitative PCR and the 2(-Delta Delta C(T)) Method. *Methods San*  
825 *Diego Calif* **2001**, *25* (4), 402–408. <https://doi.org/10.1006/meth.2001.1262>.
- 826 (42) Robinson, D. L.; Venton, B. J.; Heien, M. L. A. V.; Wightman, R. M. Detecting  
827 Subsecond Dopamine Release with Fast-Scan Cyclic Voltammetry in Vivo. *Clin.*  
828 *Chem.* **2003**, *49* (10), 1763–1773. <https://doi.org/10.1373/49.10.1763>.
- 829 (43) Yang, H.; Michael, A. C. In Vivo Fast-Scan Cyclic Voltammetry of Dopamine near  
830 Microdialysis Probes. In *Electrochemical Methods for Neuroscience*; Michael, A.  
831 C., Borland, L. M., Eds.; Frontiers in Neuroengineering; CRC Press/Taylor &  
832 Francis: Boca Raton (FL), 2007.
- 833 (44) John, C. E.; Jones, S. R. Fast Scan Cyclic Voltammetry of Dopamine and Serotonin  
834 in Mouse Brain Slices. In *Electrochemical Methods for Neuroscience*; Michael, A.

- 835 C., Borland, L. M., Eds.; *Frontiers in Neuroengineering*; CRC Press/Taylor &  
836 Francis: Boca Raton (FL), 2007.
- 837 (45) O'Neill, B.; Patel, J. C.; Rice, M. E. Characterization of Optically and Electrically  
838 Evoked Dopamine Release in Striatal Slices from Digenic Knock-in Mice with  
839 DAT-Driven Expression of Channelrhodopsin. *ACS Chem. Neurosci.* **2017**, *8* (2),  
840 310–319. <https://doi.org/10.1021/acschemneuro.6b00300>.
- 841 (46) Congar, P.; Bergevin, A.; Trudeau, L.-E. D2 Receptors Inhibit the Secretory Process  
842 Downstream From Calcium Influx in Dopaminergic Neurons: Implication of K<sup>+</sup>  
843 Channels. *J. Neurophysiol.* **2002**, *87* (2), 1046–1056.  
844 <https://doi.org/10.1152/jn.00459.2001>.
- 845 (47) Kristensen, A. S.; Andersen, J.; Jørgensen, T. N.; Sørensen, L.; Eriksen, J.; Loland,  
846 C. J.; Strømgaard, K.; Gether, U. SLC6 Neurotransmitter Transporters: Structure,  
847 Function, and Regulation. *Pharmacol. Rev.* **2011**, *63* (3), 585–640.  
848 <https://doi.org/10.1124/pr.108.000869>.
- 849 (48) Lebowitz, J. J.; Khoshbouei, H. Heterogeneity of Dopamine Release Sites in Health  
850 and Degeneration. *Neurobiol. Dis.* **2020**, *134*, 104633.  
851 <https://doi.org/10.1016/j.nbd.2019.104633>.
- 852 (49) Chen, B. T.; Patel, J. C.; Moran, K. A.; Rice, M. E. Differential Calcium  
853 Dependence of Axonal versus Somatodendritic Dopamine Release, with  
854 Characteristics of Both in the Ventral Tegmental Area. *Front. Syst. Neurosci.* **2011**,  
855 *5*, 39. <https://doi.org/10.3389/fnsys.2011.00039>.
- 856 (50) Nair-Roberts, R. G.; Chatelain-Badie, S. D.; Benson, E.; White-Cooper, H.; Bolam,  
857 J. P.; Ungless, M. A. Stereological Estimates of Dopaminergic, GABAergic and



- 858           Glutamatergic Neurons in the Ventral Tegmental Area, Substantia Nigra and  
859           Retrobulbar Field in the Rat. *Neuroscience* **2008**, *152* (4–2), 1024–1031.  
860           <https://doi.org/10.1016/j.neuroscience.2008.01.046>.
- 861   (51) Deutch, A. Y.; Goldstein, M.; Baldino, F.; Roth, R. H. Telencephalic Projections of  
862           the A8 Dopamine Cell Group. *Ann. N. Y. Acad. Sci.* **1988**, *537*, 27–50.  
863           <https://doi.org/10.1111/j.1749-6632.1988.tb42095.x>.
- 864   (52) Bayer, V. E.; Pickel, V. M. Ultrastructural Localization of Tyrosine Hydroxylase in  
865           the Rat Ventral Tegmental Area: Relationship between Immunolabeling Density  
866           and Neuronal Associations. *J. Neurosci. Off. J. Soc. Neurosci.* **1990**, *10* (9), 2996–  
867           3013.
- 868   (53) Fernandes Xavier, F. G.; Doucet, G.; Geffard, M.; Descarries, L. Dopamine  
869           Neoinnervation in the Substantia Nigra and Hyperinnervation in the Interpeduncular  
870           Nucleus of Adult Rat Following Neonatal Cerebroventricular Administration of 6-  
871           Hydroxydopamine. *Neuroscience* **1994**, *59* (1), 77–87. [https://doi.org/10.1016/0306-](https://doi.org/10.1016/0306-4522(94)90100-7)  
872           4522(94)90100-7.
- 873   (54) Burke, R. E.; O'Malley, K. Axon Degeneration in Parkinson's Disease. *Exp.*  
874           *Neurol.* **2013**, *246*, 72–83. <https://doi.org/10.1016/j.expneurol.2012.01.011>.
- 875   (55) Robertson, G. S.; Robertson, H. A. Evidence That L-Dopa-Induced Rotational  
876           Behavior Is Dependent on Both Striatal and Nigral Mechanisms. *J. Neurosci.* **1989**,  
877           *9* (9), 3326–3331. <https://doi.org/10.1523/JNEUROSCI.09-09-03326.1989>.
- 878   (56) Crocker, A. D. The Regulation of Motor Control: An Evaluation of the Role of  
879           Dopamine Receptors in the Substantia Nigra. *Rev. Neurosci.* **1997**, *8* (1), 55–76.

- 880 (57) Andersson, D. R.; Nissbrandt, H.; Bergquist, F. Partial Depletion of Dopamine in  
881 Substantia Nigra Impairs Motor Performance without Altering Striatal Dopamine  
882 Neurotransmission. *Eur. J. Neurosci.* **2006**, *24* (2), 617–624.  
883 <https://doi.org/10.1111/j.1460-9568.2006.04953.x>.
- 884 (58) Fahn, S. The Medical Treatment of Parkinson Disease from James Parkinson to  
885 George Cotzias. *Mov. Disord. Off. J. Mov. Disord. Soc.* **2015**, *30* (1), 4–18.  
886 <https://doi.org/10.1002/mds.26102>.
- 887 (59) Parmar, M.; Torper, O.; Drouin-Ouellet, J. Cell-Based Therapy for Parkinson’s  
888 Disease: A Journey through Decades toward the Light Side of the Force. *Eur. J.*  
889 *Neurosci.* **2019**, *49* (4), 463–471. <https://doi.org/10.1111/ejn.14109>.
- 890 (60) Shimojo, M.; Madara, J.; Pankow, S.; Liu, X.; Yates, J.; Südhof, T. C.; Maximov,  
891 A. Synaptotagmin-11 Mediates a Vesicle Trafficking Pathway That Is Essential for  
892 Development and Synaptic Plasticity. *Genes Dev.* **2019**, *33* (5–6), 365–376.  
893 <https://doi.org/10.1101/gad.320077.118>.
- 894 (61) von Poser, C.; Ichtchenko, K.; Shao, X.; Rizo, J.; Südhof, T. C. The Evolutionary  
895 Pressure to Inactivate. A Subclass of Synaptotagmins with an Amino Acid  
896 Substitution That Abolishes Ca<sup>2+</sup> Binding. *J. Biol. Chem.* **1997**, *272* (22), 14314–  
897 14319. <https://doi.org/10.1074/jbc.272.22.14314>.
- 898 (62) Huynh, D. P.; Scoles, D. R.; Nguyen, D.; Pulst, S. M. The Autosomal Recessive  
899 Juvenile Parkinson Disease Gene Product, Parkin, Interacts with and Ubiquitinates  
900 Synaptotagmin XI. *Hum. Mol. Genet.* **2003**, *12* (20), 2587–2597.  
901 <https://doi.org/10.1093/hmg/ddg269>.

- 902 (63) International Parkinson Disease Genomics Consortium; Nalls, M. A.; Plagnol, V.;  
903 Hernandez, D. G.; Sharma, M.; Sheerin, U.-M.; Saad, M.; Simón-Sánchez, J.;  
904 Schulte, C.; Lesage, S.; Sveinbjörnsdóttir, S.; Stefánsson, K.; Martinez, M.; Hardy,  
905 J.; Heutink, P.; Brice, A.; Gasser, T.; Singleton, A. B.; Wood, N. W. Imputation of  
906 Sequence Variants for Identification of Genetic Risks for Parkinson's Disease: A  
907 Meta-Analysis of Genome-Wide Association Studies. *Lancet Lond. Engl.* **2011**, *377*  
908 (9766), 641–649. [https://doi.org/10.1016/S0140-6736\(10\)62345-8](https://doi.org/10.1016/S0140-6736(10)62345-8).
- 909 (64) Wang, C.; Kang, X.; Zhou, L.; Chai, Z.; Wu, Q.; Huang, R.; Xu, H.; Hu, M.; Sun,  
910 X.; Sun, S.; Li, J.; Jiao, R.; Zuo, P.; Zheng, L.; Yue, Z.; Zhou, Z. Synaptotagmin-11  
911 Is a Critical Mediator of Parkin-Linked Neurotoxicity and Parkinson's Disease-like  
912 Pathology. *Nat. Commun.* **2018**, *9* (1), 1–14. [https://doi.org/10.1038/s41467-017-](https://doi.org/10.1038/s41467-017-02593-y)  
913 [02593-y](https://doi.org/10.1038/s41467-017-02593-y).
- 914 (65) Robinson, B. G.; Cai, X.; Wang, J.; Bunzow, J. R.; Williams, J. T.; Kaeser, P. S.  
915 RIM Is Essential for Stimulated but Not Spontaneous Somatodendritic Dopamine  
916 Release in the Midbrain. *eLife* **2019**, *8*, e47972. <https://doi.org/10.7554/eLife.47972>.
- 917 (66) Sugita, S.; Han, W.; Butz, S.; Liu, X.; Fernández-Chacón, R.; Lao, Y.; Südhof, T. C.  
918 Synaptotagmin VII as a Plasma Membrane Ca(2+) Sensor in Exocytosis. *Neuron*  
919 **2001**, *30* (2), 459–473.
- 920

**Fig.1**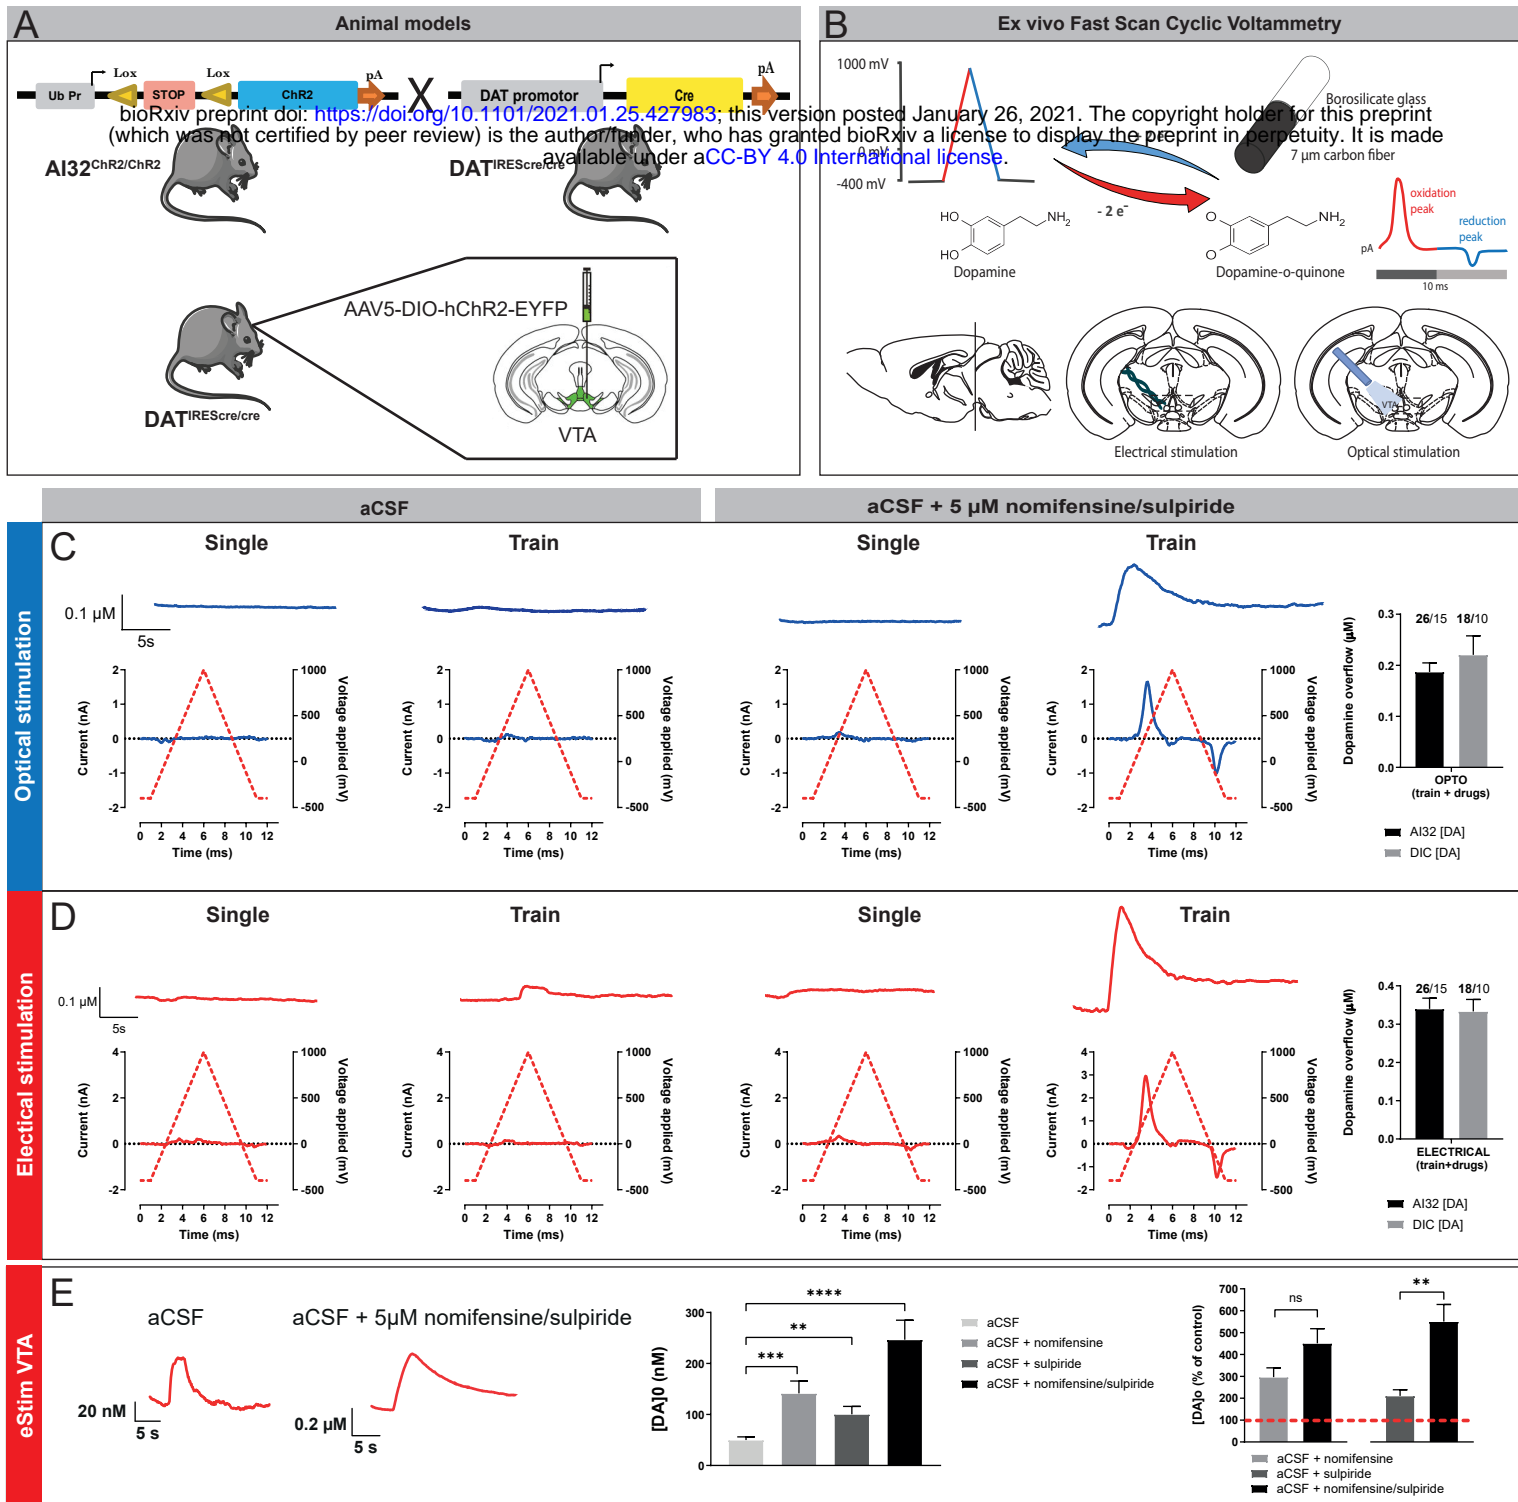

Fig.2

AI32<sup>Chr2/+</sup>; DAT<sup>IREScr/+</sup>

DAT<sup>IREScr/+</sup>/AAV-hChR2

Optical stimulation

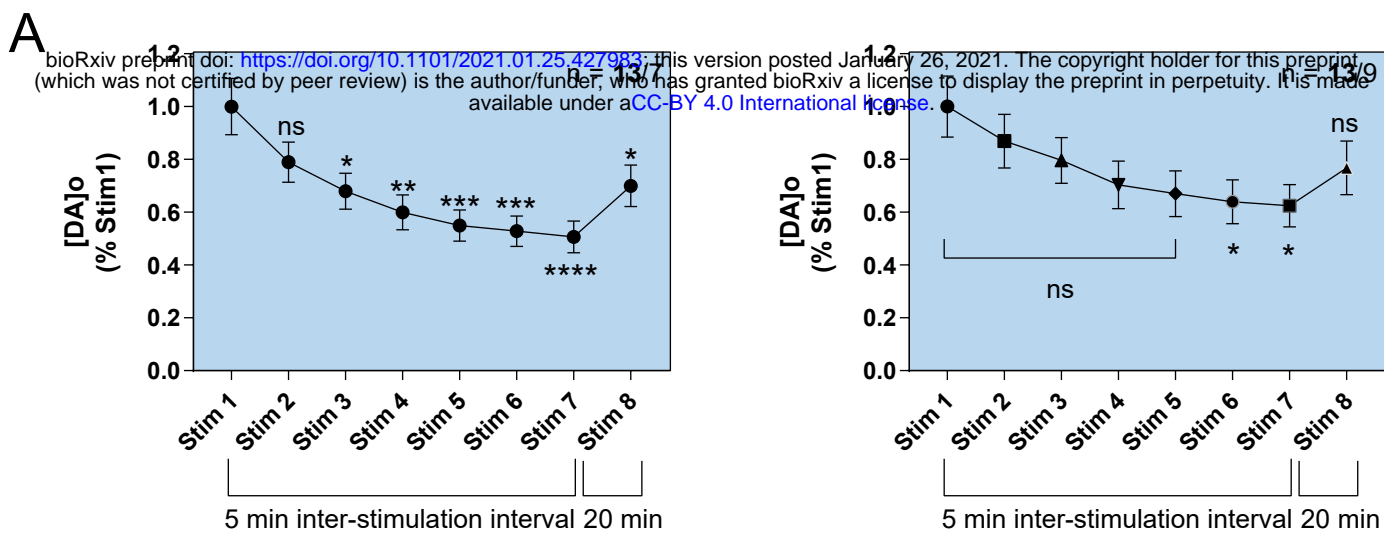

Electrical stimulation

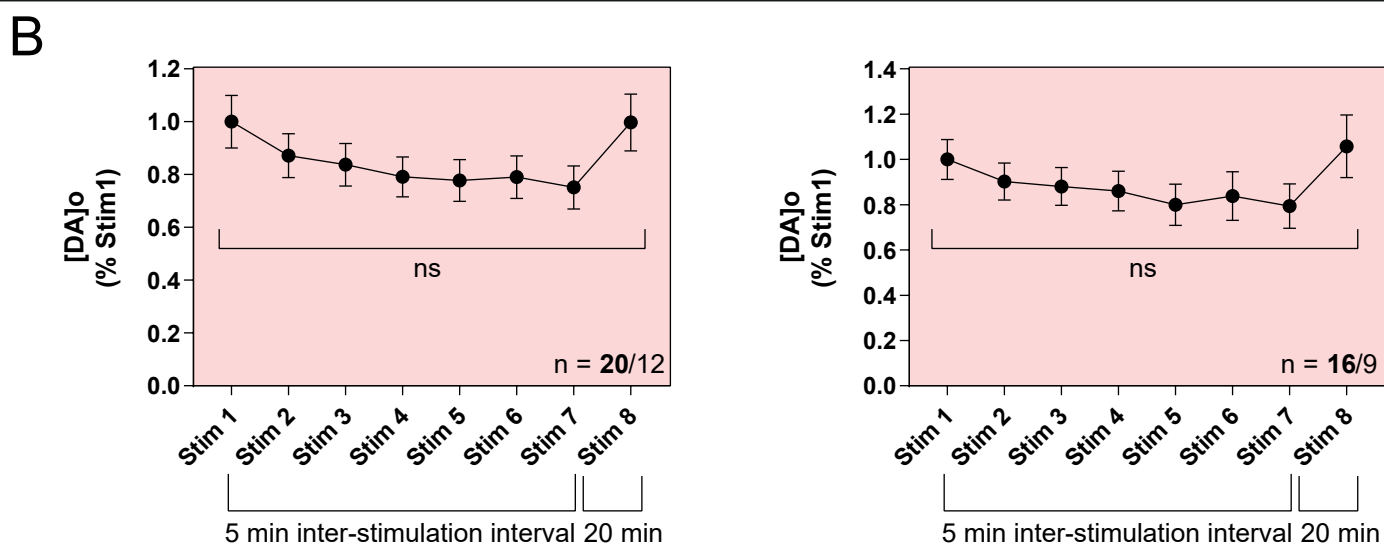

**Fig.3**

⚡ Single / pulse-train stimulation ⚡ ⚡ ⚡  
 Slice placed in 0.0 mM Ca<sup>2+</sup> 0.5 mM Ca<sup>2+</sup> 2.4 mM Ca<sup>2+</sup> 2.4 mM Ca<sup>2+</sup>  
 or 0.5 mM Ca<sup>2+</sup> or 0.5 mM Ca<sup>2+</sup> or 0.5 mM Ca<sup>2+</sup> or 0.5 mM Ca<sup>2+</sup>  
+ 5 μM nomifensine/sulpiride

bioRxiv preprint doi: <https://doi.org/10.1101/2021.01.25.427083>; this version posted January 28, 2021. The copyright holder for this preprint (which was not certified by peer review) is the author/funder, who has granted bioRxiv a license to display the preprint in perpetuity. It is made available under aCC-BY 4.0 International license.

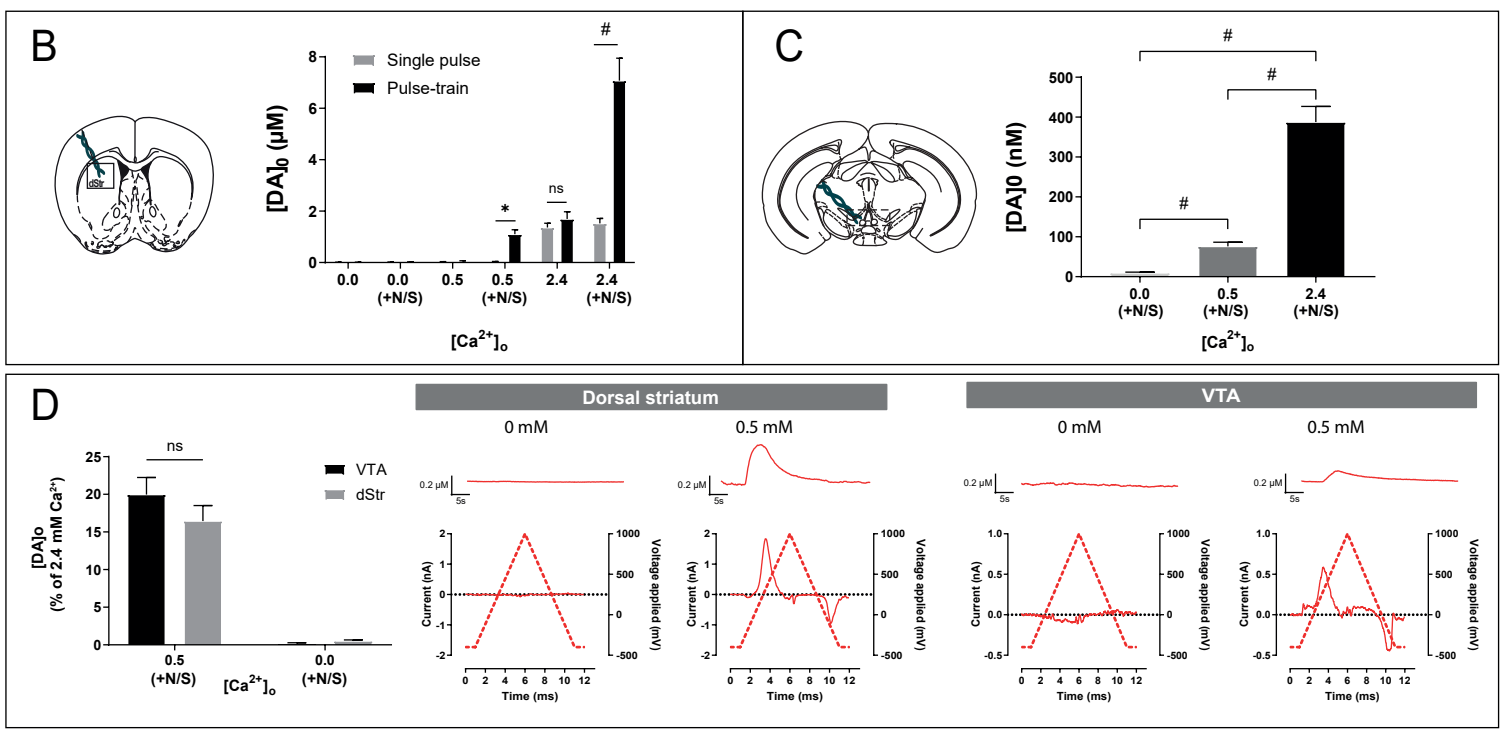

**Fig.4**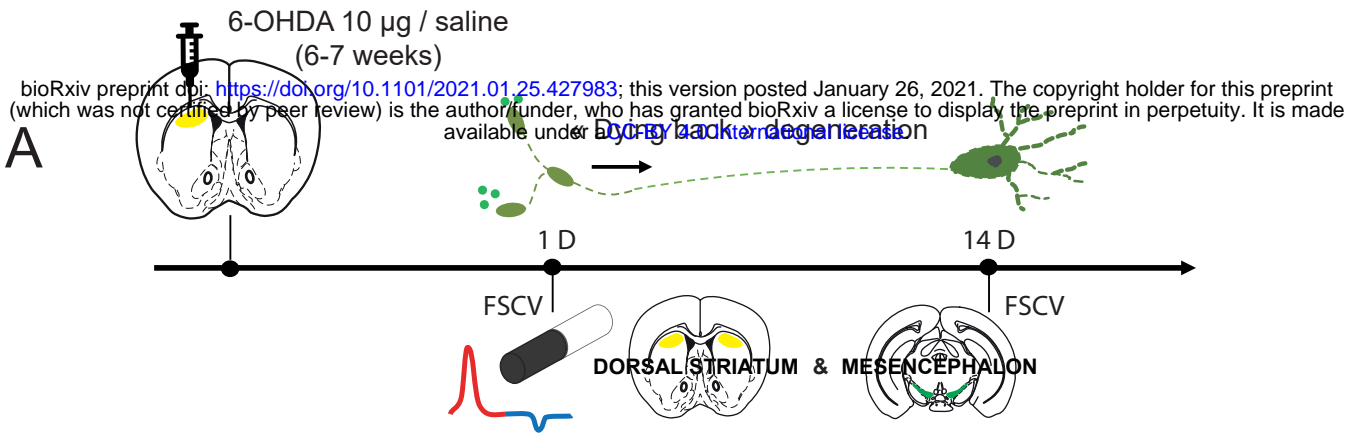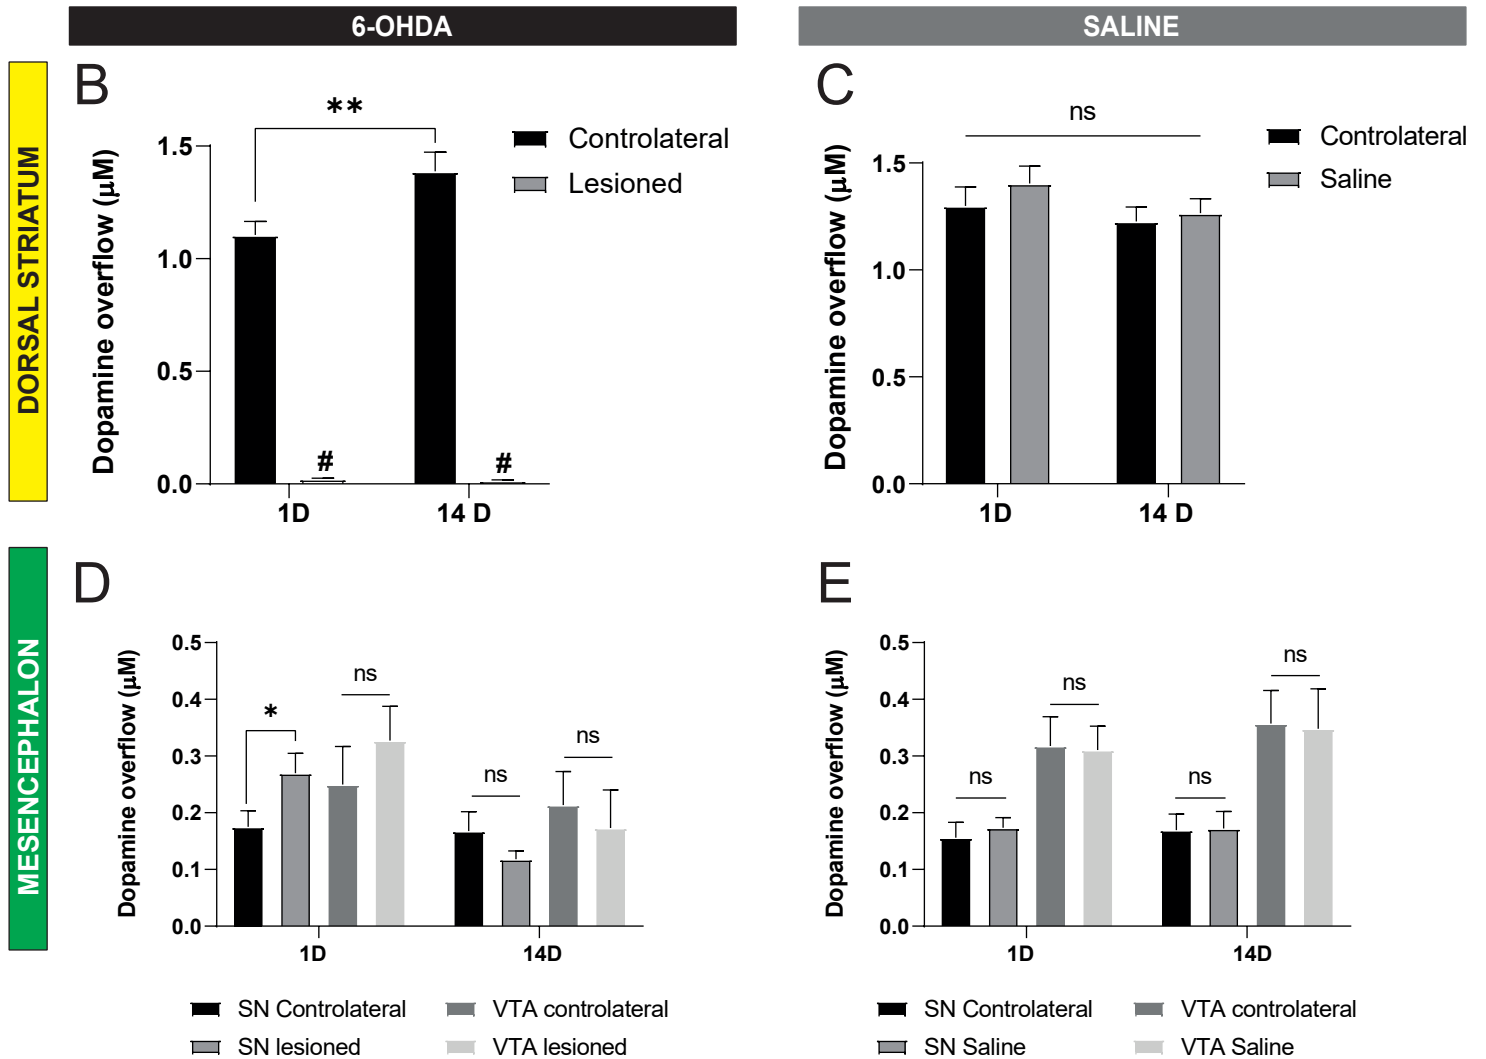

**Fig.5**

- A**
- 1 First **primary** Ab (rabbit)
  - 2 First **secondary** Ab (goat anti-rabbit)
  - 3 **IgG** from normal rabbit serum
  - 4 Block with Fab fragments (goat anti-rabbit)
  - 5 Second **primary** Ab (rabbit)
  - 6 Second **secondary** Ab (goat anti-rabbit)

bioRxiv preprint doi: <https://doi.org/10.1101/2021.01.25.427983>; this version posted January 26, 2021. The copyright holder for this preprint (which was not certified by peer review) is the author/funder, who has granted bioRxiv a license to display the preprint in perpetuity. It is made available under aCC-BY 4.0 International license.

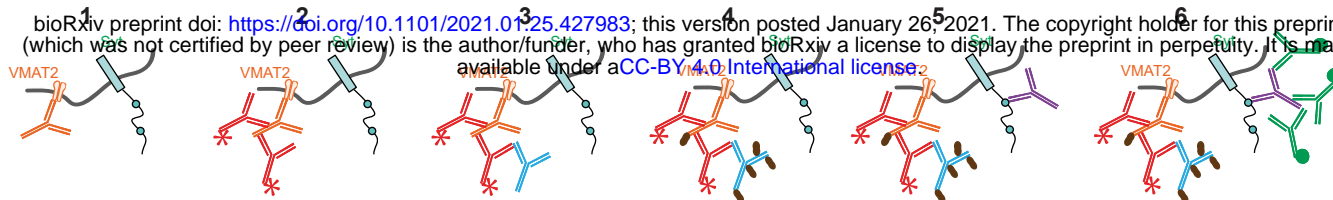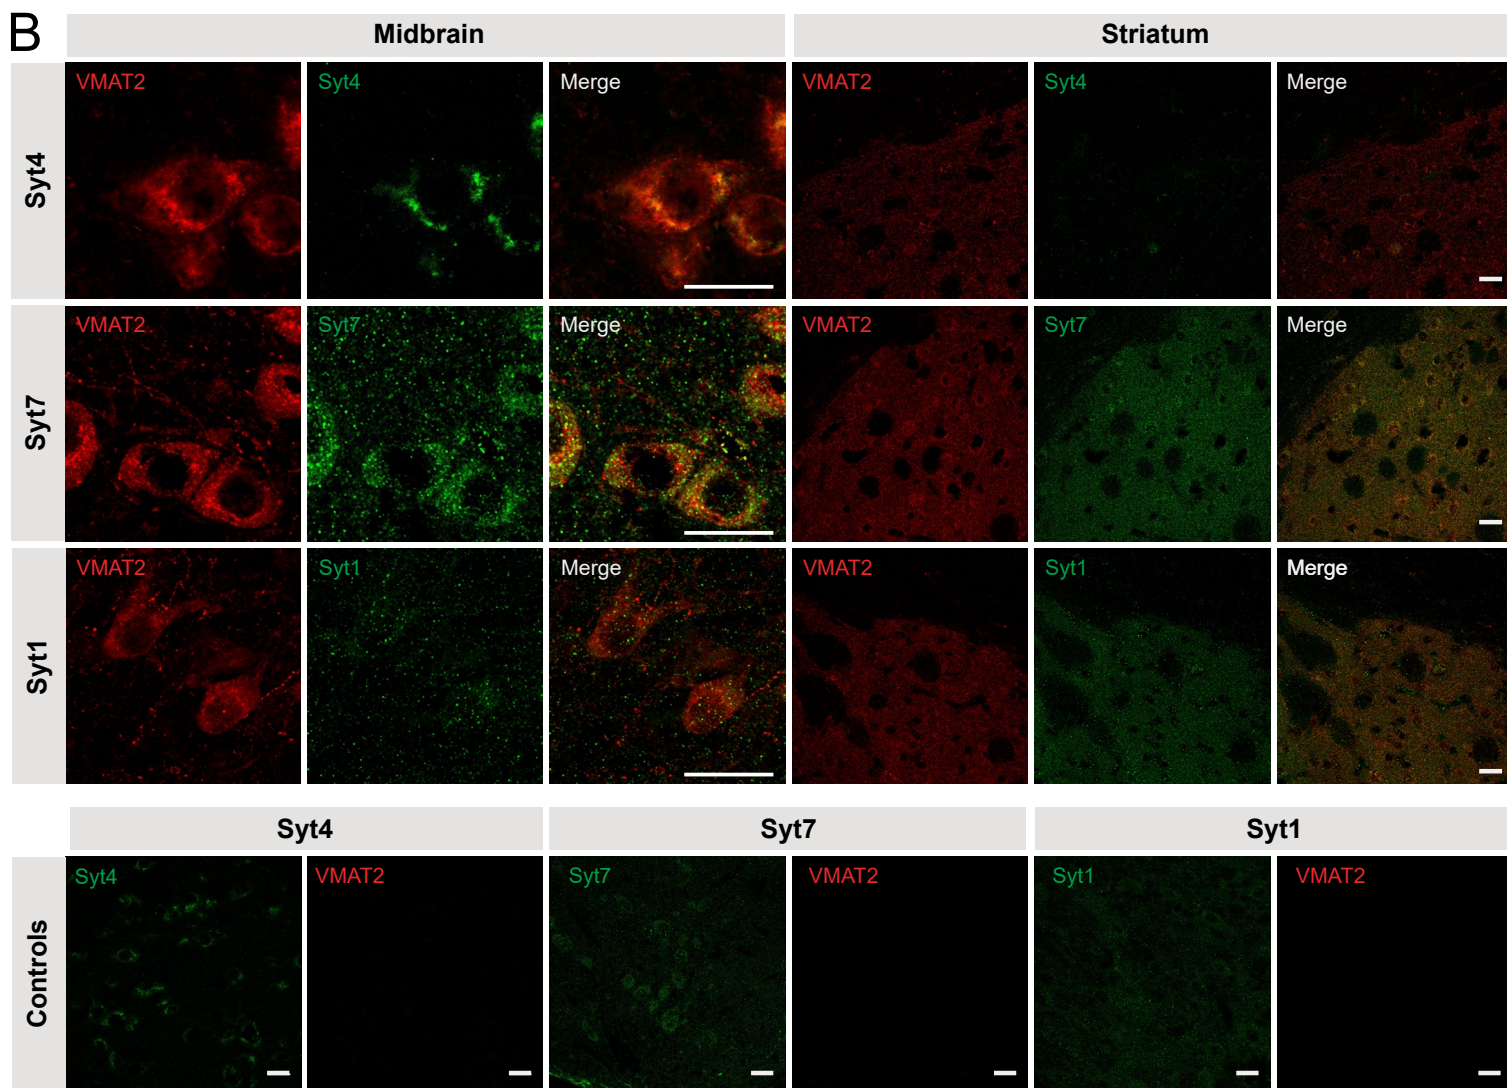



Fig.6

A

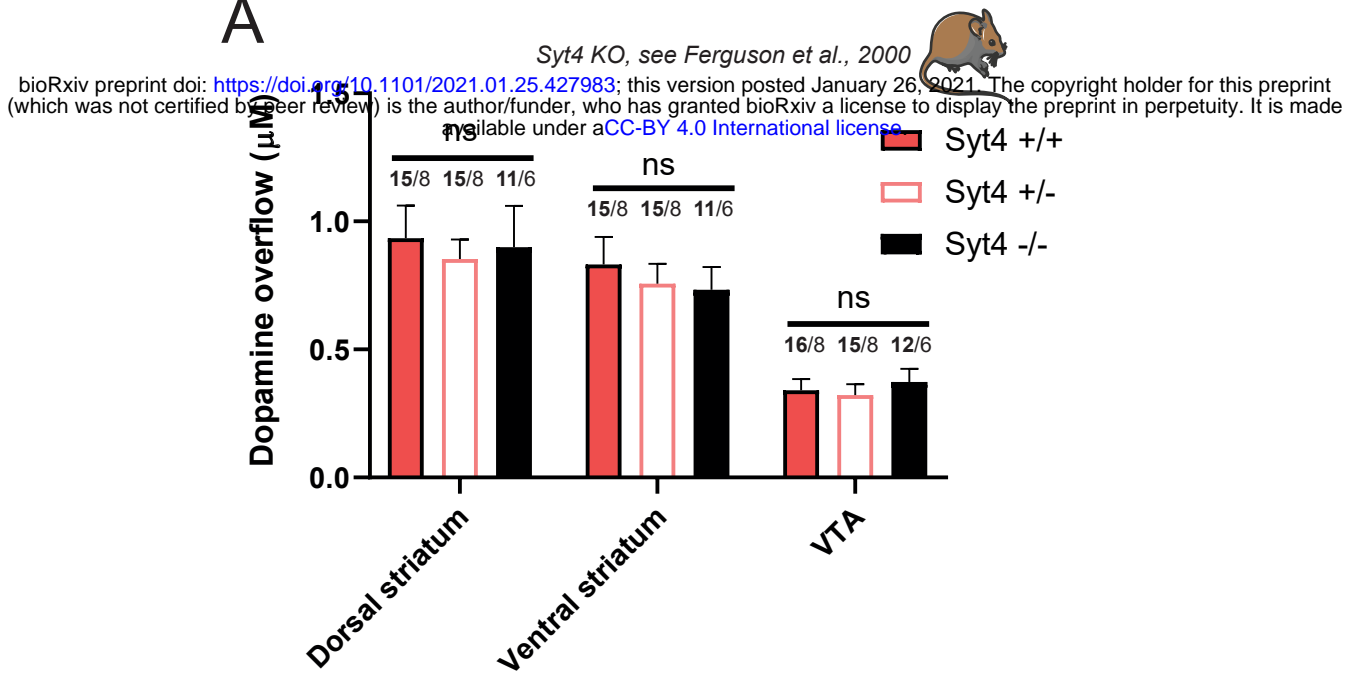

B

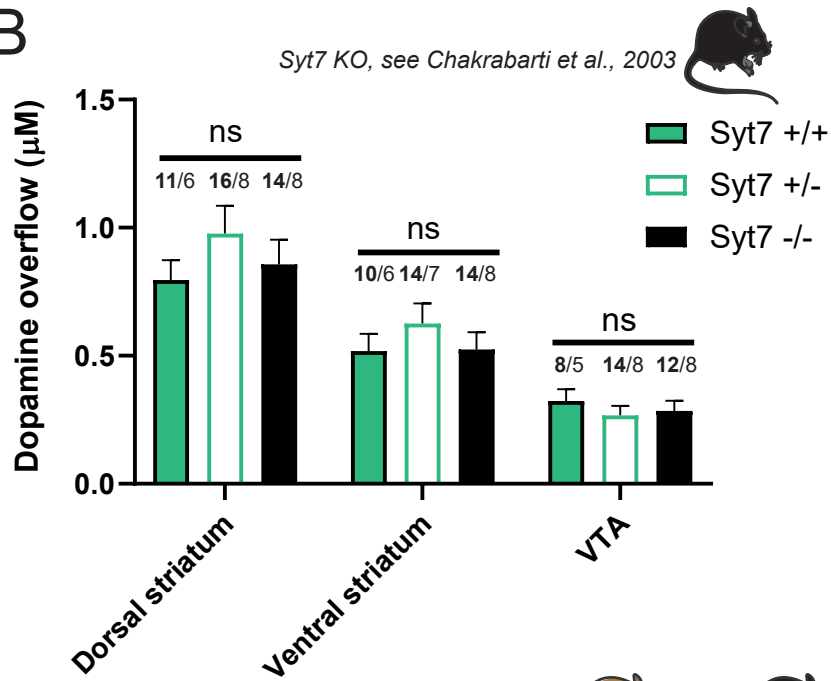

C

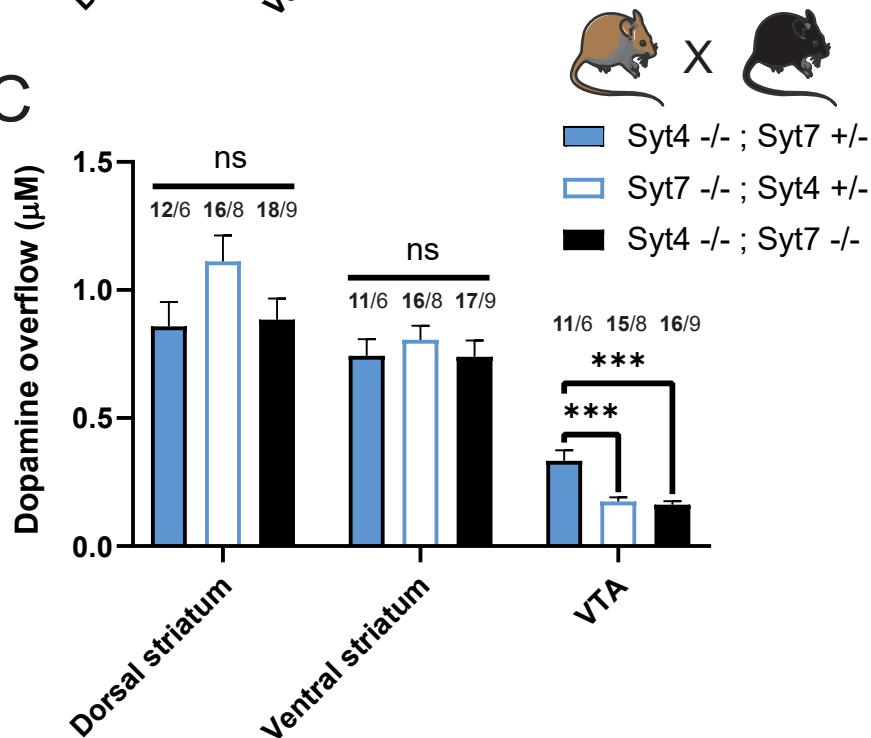

Fig. S1

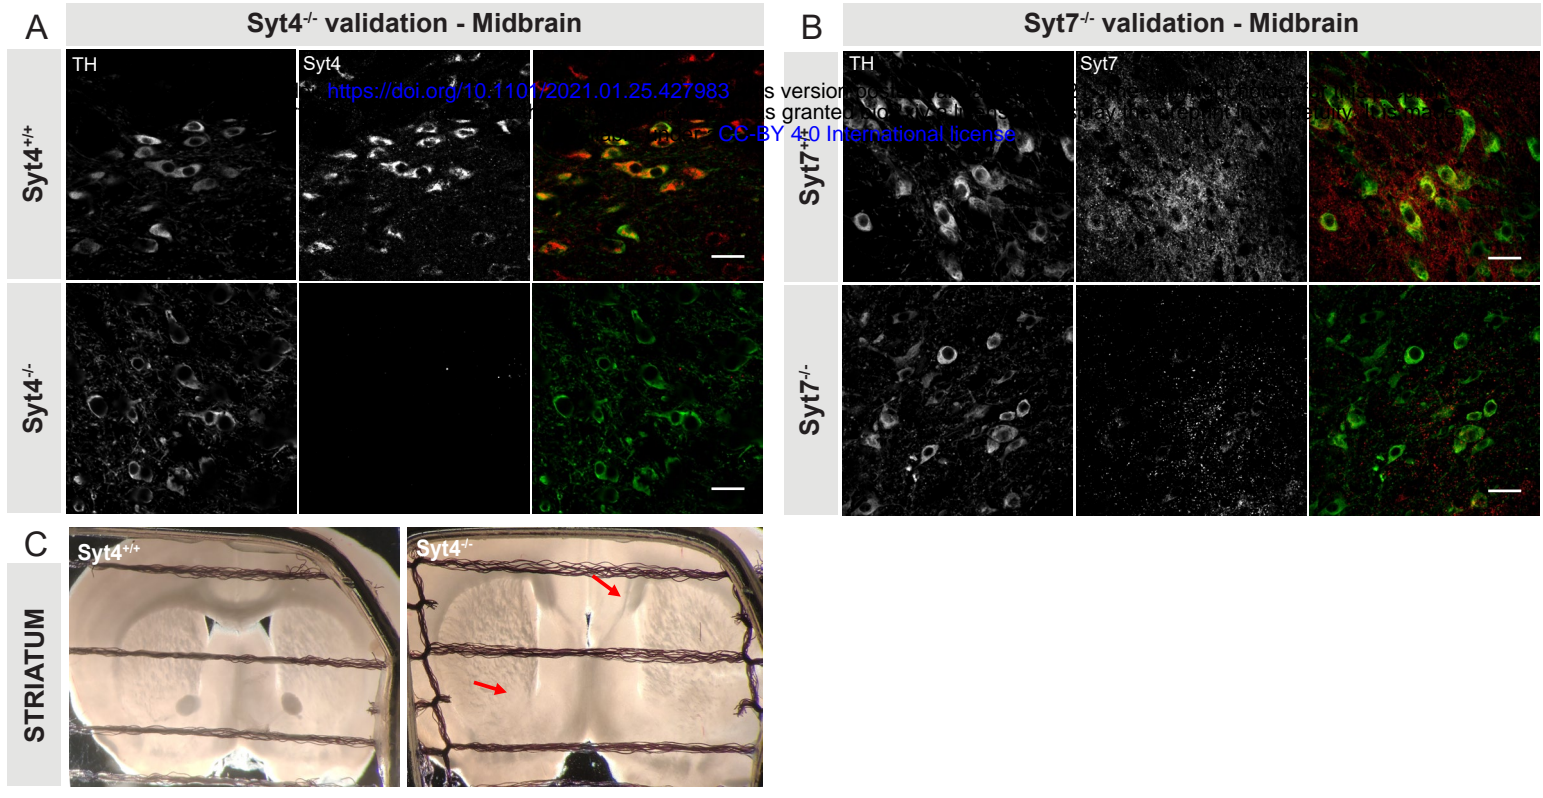

**Fig.S2**

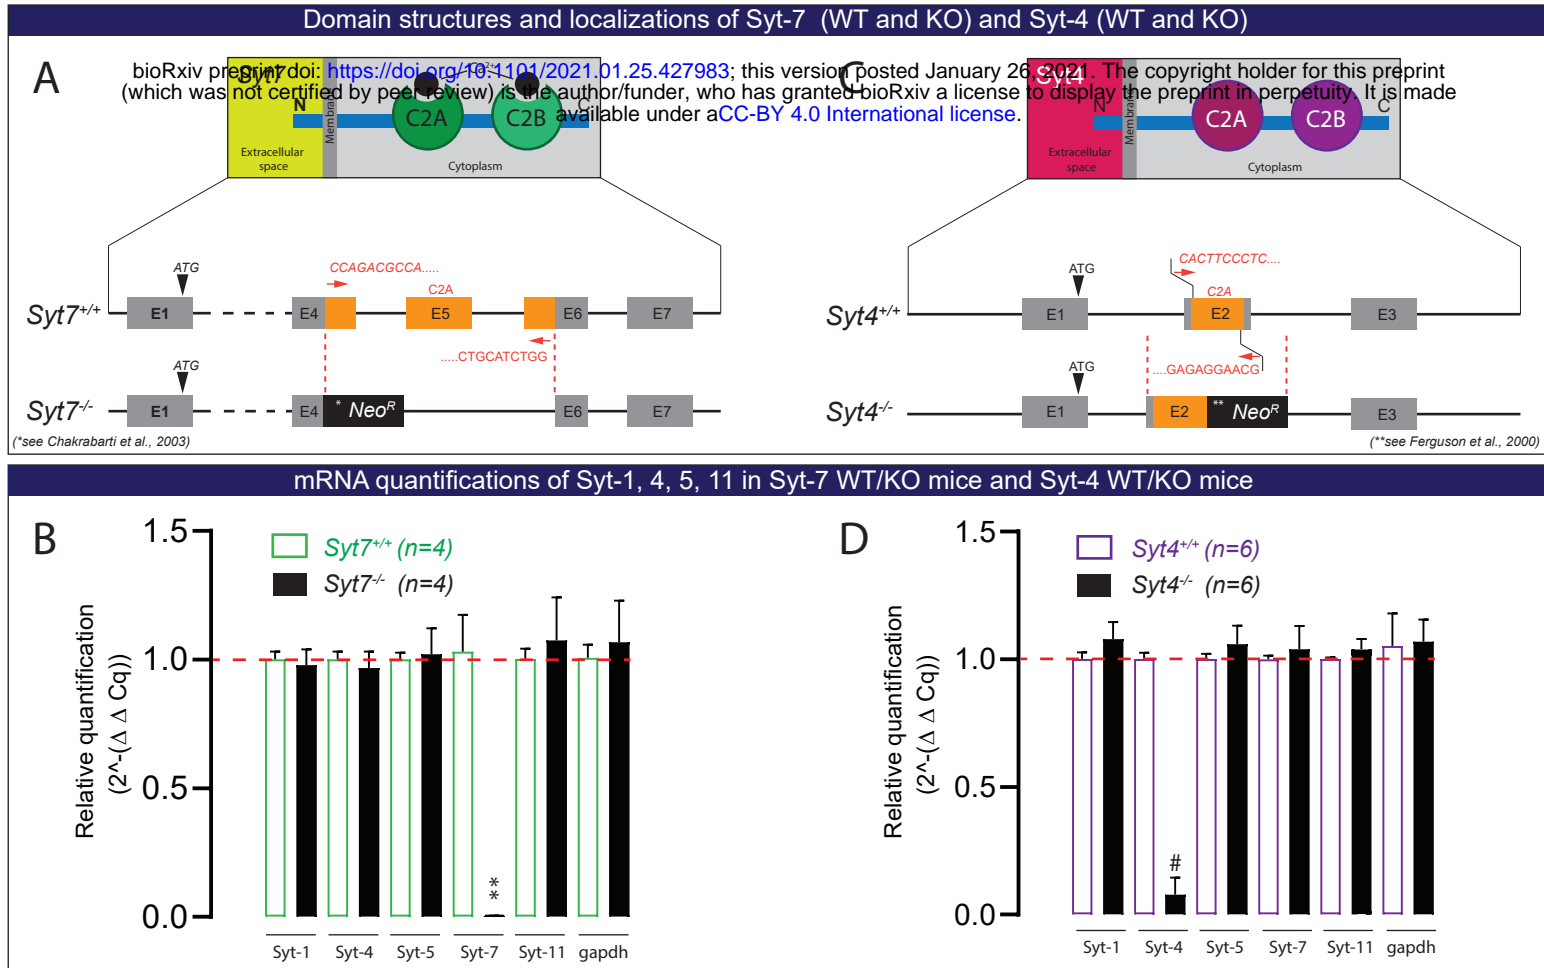

Source: http://biorxiv.org/content/10.1101/2021.01.25.427983v1.full.pdf
